1 **Prediction performance of linear models and gradient boosting machine on complex**  
2 **phenotypes in outbred mice**

3 B.C. Perez<sup>1</sup>, M.C.A.M. Bink<sup>1</sup>, G.A. Churchill<sup>2</sup>, K.L. Svenson<sup>2</sup>, M.P.L. Calus<sup>3</sup>

4 <sup>1</sup> *Hendrix Genetics B.V., Research and Technology Center (RTC), P.O. Box 114, 5830 AC*  
5 *Boxmeer, the Netherlands.*

6 <sup>2</sup> *The Jackson Laboratory, Bar Harbor, Maine, United States of America.*

7 <sup>3</sup> *Wageningen University & Research, Animal Breeding and Genomics, P.O. Box 338, 6700*  
8 *AH Wageningen, the Netherlands.*

9

10 Corresponding author: [mario.calus@wur.nl](mailto:mario.calus@wur.nl)

11

12 **ABSTRACT**

13 Recent literature suggests machine learning methods can capture interactions between loci  
14 and therefore could outperform linear models when predicting traits with relevant epistatic  
15 effects. However, investigating this empirically requires data with high mapping resolution  
16 and phenotypes for traits with known non-additive gene action. The objective of the present  
17 study was to compare the performance of linear (GBLUP, BayesB and elastic net [ENET])  
18 methods to a non-parametric tree-based ensemble (gradient boosting machine – GBM)  
19 method for genomic prediction of complex traits in mice. The dataset used contained  
20 phenotypic and genotypic information for 835 animals from 6 non-overlapping generations.  
21 Traits analyzed were bone mineral density (BMD), body weight at 10, 15 and 20 weeks  
22 (BW10, BW15 and BW20), fat percentage (FAT%), circulating cholesterol (CHOL), glucose  
23 (GLUC), insulin (INS) and triglycerides (TGL), and urine creatinine (UCRT). After quality  
24 control, the genotype dataset contained 50,112 SNP markers. Animals from older  
25 generations were considered as a reference subset, while animals in the latest generation as  
26 candidates for the validation subset. We also evaluated the impact of different levels of  
27 connectedness between reference and validation sets. Model performance was measured  
28 as the Pearson's correlation coefficient and mean squared error (MSE) between adjusted  
29 phenotypes and the model's prediction for animals in the validation subset. Outcomes were  
30 also compared across models by checking the overlapping top markers and animals. Linear  
31 models outperformed GBM for seven out of ten traits. For these models, accuracy was  
32 proportional to the trait's heritability. For traits BMD, CHOL and GLU, the GBM model  
33 showed better prediction accuracy and lower MSE. Interestingly, for these three traits there  
34 is evidence in literature of a relevant portion of phenotypic variance being explained by  
35 epistatic effects. We noticed that for lower connectedness, i.e., imposing a gap of one to two  
36 generations between reference and validation populations, the superior performance of GBM  
37 was only maintained for GLU. Using a subset of top markers selected from a GBM model  
38 helped for some of the traits to improve accuracy of prediction when these were fitted into  
39 linear and GBM models. The GBM model showed consistently fewer markers and animals in  
40 common among the top ranked than linear models. Our results indicate that GBM is more  
41 strongly affected by data size and decreased connectedness between reference and  
42 validation sets than the linear models. Nevertheless, our results indicate that GBM is a  
43 competitive method to predict complex traits in an outbred mice population, especially for  
44 traits with assumed epistatic effects.

45

46

## 47 **INTRODUCTION**

48         The use of genome-wide markers as predictor variables for individuals' unobserved  
49 phenotypes (Meuwissen et al., 2001) based on a reference population is known as genomic  
50 prediction (GP). In the past decade, high-throughput genotyping technologies made GP  
51 accessible and facilitated large-scale use of GP for animal (Boichard, 2016) and plant (Bhat  
52 et al., 2016) breeding, and in human genetics (Lappalainen et al., 2019). For animals and  
53 plants, GP has reduced breeding costs and speeded up breeding programs as individuals of  
54 interest can be selected in earlier stages of life, while reducing costs for performance testing.  
55 In humans, major efforts have been put into developing GP to score disease risks (Duncan  
56 et al., 2019), aiming for a more personalized medicine in the future (Barrera-Saldaña, 2020).

57         Currently, most GP models implemented assume that observed phenotypes are  
58 controlled by numerous loci with additive effects throughout the genome and this approach  
59 has provided a robust performance in most cases (Meuwissen et al., 2001; Calus, 2010).  
60 However, in the literature it has been suggested that the genetic architecture of complex  
61 traits may involve significant proportions of non-additive genetic (dominance or epistasis)  
62 effects (Mackay, 2014) and that these could be much more common than previously thought  
63 (Sackton and Hartl, 2016). Although accounting for non-additive effects into parametric GP  
64 models has been reported to improve predictive performance (Forsberg et al., 2017) of  
65 phenotypes, implementing variable selection to prioritize among all possible SNP by SNP  
66 interactions, is computationally too costly for any practical application.

67         Machine learning (ML) has been successfully used in many fields for text, image and  
68 audio processing at huge data volumes. Recently, these algorithms have found many  
69 applications in GP for offering an opportunity to model complex trait architectures in a much  
70 simpler framework than parametric models (Nayeri et al. 2019; Montesinos-López et al.,  
71 2021; van Dijk et al., 2021). ML algorithms are free from model specification, can  
72 accommodate interactions between predictive variables and deal with large numbers of

73 predictor variables by performing automatic variable selection (Jiang et al., 2009; Li et al.,  
74 2018).

75           Howard et al. (2014), Ghafouri-Kesbi et al. (2015) and Abdolahi-Arpanahi et al.  
76 (2020) have compared the predictive performance of linear and ML models for simulated  
77 phenotypes controlled by additive or non-additive effects. In general, linear models were  
78 able to outperform ML models for traits controlled by additive effects, however they failed to  
79 do so when used to predict traits with purely epistatic architecture. The superiority of ML  
80 over traditional linear models was markedly observed for traits controlled by a low number of  
81 loci (100) with non-additive effects. For this type of scenario, Ghafouri-Kesbi et al. (2015)  
82 and Abdolahi-Arpanahi et al. (2020) also showed a consistent good performance of the  
83 gradient boosting machine (GBM) algorithm (Friedman, 2001), which has previously been  
84 reported to provide robust predictive ability when compared to other methods in the context  
85 of GP (González-Recio et al., 2011, 2013, 2014; Ogutu et al., 2011; Jimenez-Montero et al.,  
86 2013; Grinberg et al., 2019; Srivastava et al., 2021).

87           Although results in simulated data suggest the superiority of ML models in the  
88 presence of epistatic effects, the performance of such models have been much less  
89 consistent for GP using real datasets. Zingaretti et al. (2020) observed that convolutional  
90 neural networks (CNN) had 20% higher predictive accuracy than linear models for GP of a  
91 trait with a strong dominance component (percentage of culled fruit) in strawberry but  
92 underperformed for traits with predominant additive effects. On the other hand, in Azodi et al.  
93 (2019), ML did not consistently outperform linear models for traits with strong evidence of  
94 underlying non-additive architectures (for example height in maize and rice). The authors  
95 also describe that ML models presented less stable prediction across traits than linear  
96 models. Similar results were also reported by Bellot et al. (2018) while investigating the  
97 performance of GP for several complex human phenotypes. An important aspect to consider  
98 when investigating performance of GP models is that for most livestock and plant species  
99 there is currently limited knowledge over the genetic architecture of economically interesting

100 traits. This makes it difficult to perform inference about the real reasons why ML outperforms  
101 linear models in specific situations. This could be overcome by considering data from  
102 populations for which knowledge on genetic architecture of traits is more extensively and  
103 accurately described.

104 The Diversity Outbred (DO) mice population is derived from eight inbred founder  
105 strains (Svenson et al. 2012). It is an interesting resource for high-resolution genetic  
106 mapping by having a low level of genetic relationship between individuals, low extent of LD  
107 (Churchill et al., 2012) and uniformly distributed variation across genomic regions of known  
108 genes (Yang et al., 2011). This structure represents an advantage over classical inbred  
109 strains of mice or livestock populations, which have limited genetic diversity (Yang et al.  
110 2011). These aspects allow the investigation of relevant traits in a structured scheme that  
111 closely reflects the genetic mechanisms of human disease (Churchill et al., 2012, Svenson  
112 et al., 2012).

113 In the present study, the objective was to compare performance of GBM to several  
114 linear models (GBLUP, BayesB and elastic net) for predicting ten complex phenotypes in the  
115 DO mice population. All models were applied for scenarios where data was not available for  
116 one or more generations in between the reference and validation sets. Additionally, we  
117 explore the use of feature selection from the GBM algorithm as a tool for sub-setting relevant  
118 markers and to improve prediction accuracy through dimensional reduction.

119

## 120 **MATERIAL AND METHODS**

### 121 ***Data***

#### 122 *Phenotypes*

123 The DO mice dataset comprising 835 animals was obtained from The Jackson  
124 Laboratory (Bar Harbor, ME). The animals originated from 6 non-overlapping generations (4,  
125 5, 7, 8, 9 and 11) in which males and females were represented equally. The total number of  
126 animals per generation was 97, 48, 200, 184, 99 and 197 for generations 4, 5, 7, 8, 9, and

127 11, respectively, but numbers of missing records varied across traits (Figure 1). The mice  
128 were maintained on either standard high fiber (chow, n=446) or high fat diet (HFD; n=389)  
129 from weaning until 23 weeks of age. The proportion of males and females within each diet  
130 category was close to 50-50 for all generations. The same was observed for the frequency of  
131 males and females within each litter-generation combination (two litters per generation). A  
132 detailed description of husbandry and phenotyping methods can be found in Svenson et al.  
133 (2012).

134 Table 1 shows a comprehensive description of each trait regarding dataset size,  
135 estimated heritability and assumed genetic architecture with associated literature. Among all  
136 phenotypes available we chose 10 traits based on their distinct assumed genetic  
137 architectures from previous results with the same dataset (Li and Churchill, 2010; Churchill  
138 et al., 2012; Zhang et al., 2012; Tyler et al., 2016, 2017; Keller et al., 2019; Keenan et al.,  
139 2021) and other populations (Chitre et al., 2018). The analyzed traits were bone mineral  
140 density at 12 weeks (BMD), body weight at 10, 15 and 20 weeks (BW10, BW15 and BW20);  
141 circulating cholesterol at 19 weeks (CHOL), adjusted body fat percentage at 12 weeks  
142 (FATP), circulating glucose at 19 weeks (GLU), circulating triglycerides at 19 weeks (TRGL),  
143 circulating insulin at 8 weeks (INSUL) and urine creatinine at 20 weeks (UCRT). These traits  
144 can be categorized into measurements of body composition (weights and fat percentage),  
145 clinical plasma chemistries (triglycerides, glucose, insulin) and urine chemistry (urine  
146 creatinine).

147 Prior to any analyses performed in this study, phenotypic records were pre-corrected  
148 for fixed effects of diet, generation, litter and sex. The pre-corrected phenotype ( $y^*$ ) can be  
149 represented by:

$$y^* = a + e$$

150 where  $a$  is the vector of animal additive genetic effects and  $e$  the vector of residuals.

151

152

153

154

## TABLE 1

155

### 156 *Genotypes*

157 Mice from 8 distinct founder strains were genotyped using either the MUGA and  
158 MegaMUGA SNP arrays (Morgan et al. 2016). The variant calls from the arrays in the  
159 animals contained in the current dataset were converted to founder haplotypes using a  
160 hidden Markov model (HMM) (Gatti et al. 2014), which uses the order of SNPs in an  
161 individual mouse to infer transition points between different DO founder haplotypes. After  
162 that, the probability of each parental haplotype at each SNP position in the genome (Gatti et  
163 al., 2014) was used to derive SNP genotype probabilities. To accomplish that, we used  
164 functions available in the “QTL2” R package (Broman et al. 2018). The complete genotype  
165 file used for the analyses was composed of 64,000 markers reconstructed from the diplotype  
166 probabilities from the MUGA and MegaMUGA on an evenly spaced grid, and the average  
167 distance between markers was 0.0238 cM. The full genotype data (64K markers) was  
168 cleaned based on the following criteria: variants with minor allele frequency < 0.05, call rates  
169 < 0.90 and linear correlation between subsequent SNPs > 0.98 were removed. After quality  
170 control, a total of 52,840 SNP markers were available for the mice with both phenotypic and  
171 genotypic records.

172

### 173 *Genomic prediction models*

#### 174 *GBLUP*

175 The statistical model of GBLUP is:

$$\mathbf{y}^* = \mathbf{1}\mu + \mathbf{a} + \mathbf{e},$$

176 where  $\mathbf{y}^*$  is the vector of pre-corrected phenotypes,  $\mathbf{1}$  is a vector of ones,  $\mu$  is the

177 intercept,  $\mathbf{a}$  is the vector of random additive genetic values, where  $\mathbf{a} \sim N(\mathbf{0}, \mathbf{G}\sigma_a^2)$  and  $\mathbf{G}$  is the

178 additive genomic relationship matrix between genotyped individuals. It is constructed  
179 following the second method described by VanRaden (2008) as  $\frac{\mathbf{ZZ}'}{m}$  where  $\mathbf{Z}$  is the matrix of  
180 centered and standardized genotypes for all individuals and  $m$  is the number of markers,  
181 and  $\sigma_a^2$  is the additive genomic variance,  $\mathbf{e}$  is the vector of random residual effects where  
182  $\mathbf{e} \sim N(\mathbf{0}, \mathbf{I}\sigma_e^2)$  with  $\sigma_e^2$  being the residual variance, and  $\mathbf{I}$  is an identity matrix. GBLUP was  
183 implemented using a Bayesian approach using the BGLR package (Pérez and de los  
184 Campos, 2014). The Gibbs sampler was run for 150,000 iterations, with a 50,000 burn-in  
185 period and a thinning interval of 10 iterations. Consequently, inference was based on 10,000  
186 posterior samples.

187

## 188 **BayesB**

189 BayesB has been widely used for genomic prediction (Meuwissen et al., 2001), and here we  
190 considered it for being a linear model with variable selection ability. The phenotype of the  $i^{\text{th}}$   
191 individual is expressed as a linear regression on markers:

$$192 \quad \mathbf{y}^* = \mathbf{1}\mu + \mathbf{Z}\boldsymbol{\beta} + \mathbf{e} ,$$

193 where  $\mathbf{y}^*$  is the vector of pre-corrected phenotypes,  $\mathbf{1}$  is a vector of ones,  $\mu$  is the  
194 intercept,  $\boldsymbol{\beta}$  is the vector of random effect of markers,  $\mathbf{Z}$  is the incidence matrix for markers  
195 and  $\mathbf{e}$  is a random residual where  $\mathbf{e} \sim N(\mathbf{0}, \mathbf{I}\sigma_e^2)$  with  $\sigma_e^2$  being the residual variance, and  $\mathbf{I}$  is  
196 an identity matrix. Contrary to GBLUP, BayesB assumes *a priori* that all markers do not  
197 contribute to genetic variation equally. For BayesB, all markers are assumed to have a two-  
198 component mixture prior distribution. Any given marker has either a null effect with known  
199 prior probability,  $\pi$ , or a  $t$  prior distribution with probability  $(1 - \pi)$ , with  $\nu$  degrees of  
200 freedom and scale parameter  $s^2$ . Therefore, marker effects  $\boldsymbol{\beta} \sim N(0, \sigma_{gk}^2)$ , where  $\sigma_{gk}^2$   
201 is the variance of the  $k^{\text{th}}$  SNP effect. The BayesB model was implemented using the  
202 BGLR package (Pérez and de los Campos, 2014). The Gibbs sampler was run for 120,000

203 iterations, with a 20,000 burn-in period and a thinning interval of 100 iterations.

204 Consequently, inference was performed based in 10,000 posterior samples.

205

## 206 **Elastic Net**

207 The elastic net (ENET) is an extension of the lasso (Friedman et al., 2010) and is  
208 considered a robust method under the presence of strong collinearity among predictors, as  
209 is the case for genotype data. It can be described by the regression model:

$$210 \quad \mathbf{y}^* = \mathbf{Z}\boldsymbol{\beta} + \mathbf{e} ,$$

211 where  $\mathbf{y}^*$  is the vector of pre-corrected phenotypes,  $\boldsymbol{\beta}$  is the vector of random effect of  
212 markers,  $\mathbf{Z}$  is the incidence matrix for markers and  $\mathbf{e}$  is a random residual where  
213  $\mathbf{e} \sim N(\mathbf{0}, \mathbf{I}\sigma_e^2)$  with  $\sigma_e^2$  being the residual variance, and  $\mathbf{I}$  is an identity matrix..

214 The ENET uses a mixture of the  $\ell_1$  (lasso) and  $\ell_2$  (ridge regression) penalties and  
215 the estimator  $\hat{\boldsymbol{\beta}}_{ENET}$  can be formulated as:

$$\hat{\boldsymbol{\beta}}_{ENET} = \left(1 + \frac{\lambda_2}{n}\right) \{ \operatorname{argmin}_{\boldsymbol{\beta}} \|\mathbf{y} - \mathbf{X}\boldsymbol{\beta}\|_2^2 + \lambda_2 \|\boldsymbol{\beta}\|_2^2 + \lambda_1 \|\boldsymbol{\beta}\|_1 \},$$

216 where  $\|\boldsymbol{\beta}\|_1 = \sum_{j=1}^p |\beta_j|$  is the  $\ell_1$ - norm penalty on  $\boldsymbol{\beta}$ ,  $\|\boldsymbol{\beta}\|_2^2 = \sum_{j=1}^p \beta_j^2$  is the  $\ell_2$ - norm penalty  
217 on  $\boldsymbol{\beta}$ ,  $\|\mathbf{y} - \mathbf{X}\boldsymbol{\beta}\|_2^2 = \sum_{i=1}^n (\mathbf{y}_i - \mathbf{x}_i^T \boldsymbol{\beta})^2$  is the  $\ell_2$ - norm (quadratic) loss function (residual sum  
218 of squares),  $\mathbf{x}_i^T$  is the  $i$ -th row of  $\mathbf{X}$ ,  $\lambda_1$  is the parameter that controls the extent of variable  
219 selection and  $\lambda_2$  is the parameter that regulates the strength of linear shrinkage.

220 When setting  $\alpha = \frac{\lambda_2}{(\lambda_1 + \lambda_2)}$ , the ENET estimator is equivalent to the minimizer of:

$$221 \quad \hat{\boldsymbol{\beta}}_{ENET2} = \operatorname{argmin}_{\boldsymbol{\beta}} \|\mathbf{y} - \mathbf{X}\boldsymbol{\beta}\|_2^2, \text{ subject to } P_{\alpha}(\boldsymbol{\beta}) = (\mathbf{1} - \alpha)\|\boldsymbol{\beta}\|_1 + \alpha\|\boldsymbol{\beta}\|_2^2 \leq s \text{ for some } s$$

222 where  $P_{\alpha}(\boldsymbol{\beta})$  is the ENET penalty (Zou and Hastie, 2005). The ENET is equivalent to ridge  
223 regression (Hoerl and Kennard, 1970) when  $\alpha = 1$ , and to the lasso when  $\alpha = 0$ . In practice,



224 the  $\ell_1$  component performs automatic variable selection while the  $\ell_2$  component ensures  
225 that a group of highly correlated variables get effect estimates of similar magnitude.

226 We implemented the ENET model using the h2o.ai R package (Click et al. 2016). To  
227 establish the best hyperparameter set for ENET, we performed a cross-validation (splitting  
228 the reference set into 80-20 for train/test sets, as depicted in Figure 1) on a two-step  
229 scheme. First a grid search of values for the parameter  $\alpha$  considering from 0 to 1, in intervals  
230 of 0.05. For tested value of  $\alpha$ , the best value of  $\lambda$  was obtained by computing models  
231 sequentially, starting with  $\lambda = 1$  and decreasing it exponentially until 0.01 in up to 20 steps.  
232 For each analysis, the best ENET model was chosen by the combination of  $\alpha$  and  $\lambda$   
233 parameters obtained from the grid search that yielded the lowest mean squared error of  
234 prediction in the test set, and this model was used to predict the validation animals  
235 (Supplementary Material - Figure S1).

236

### 237 ***Gradient Boosting Machine***

238 Gradient boosting machine (GBM) is an ensemble learning technique that applies an  
239 iterative process of assembling “weak learners” into a stronger learner, being largely used  
240 for both classification and regression problems (Friedman, 2002;). It relies on fitting decision  
241 trees as the base learner (Hastie et al., 2009). The first tree is fitted on the errors of an  
242 initialized prediction based on the distribution of the response variable and from this point,  
243 the algorithm fits sequential trees, in which every subsequent tree aims to minimize the  
244 prediction error from the previous one until no further improvement can be achieved. Many  
245 different parameters can be used to measure that “improvement”, in the present study we  
246 used the mean squared error (MSE). GBM does automatic feature selection, prioritizing  
247 important variables and discarding ones containing irrelevant or redundant information. We  
248 implemented the GBM model using the h2o.ai R package (Click et al. 2016).

249 The performance of machine learning methods can be sensitive to hyper-parameters  
250 (Azodi et al., 2019). To obtain the best possible results from the GBM algorithm, a grid

251 search approach was used to determine the combination of hyperparameters that  
252 maximized prediction performance for each trait. Hyperparameters (and range of values)  
253 included were number of trees ( $n_{tree} = 100, 150, 200, 300, 500, 1000, 2000$  and  $5000$ ),  
254 learning rate ( $l_{rn\_rate} = 0.01; 0.05$  and  $0.10$ ) and maximum tree depth ( $max\_depth = 2, 3, 5$   
255 and  $10$ ). For each trait analyzed, the hyperparameter tuning scheme was performed inside  
256 the reference subset (cf. ENET and Figure 1). The best set of hyperparameters was chosen  
257 based on the lowest mean squared error obtained from the grid-search. Results reported in  
258 the present study for GBM model refer to the best performing model out of the grid search  
259 for each trait (Supplementary Material - Figure S1).

260

### 261 **Model performance**

262 Performance of predictions from the models was measured by the accuracy,  
263 computed as the Pearson correlation ( $r_{y^*, \hat{y}}$ ), and the mean squared error of prediction  
264 (MSE) between predicted ( $\hat{y}$ ) and pre-corrected phenotypes ( $y^*$ ):  $MSE = \frac{1}{n} \sum_{i=1}^n (y^* - \hat{y})^2$ .  
265 In all analyses, we used a forward prediction validation scheme in which animals from older  
266 generations (4, 5, 7, 8 and 9) were used as the reference and animals from the younger  
267 generation (11) as the validation subset. Uncertainties around the  $r_{y^*, \hat{y}}$  estimates were  
268 obtained by using bootstrapping (Davison and Hinkley, 1997), implemented in the “boot” R  
269 package (Canty and Ripley, 2021).

270

271

272

## FIGURE 1

273

274

## 275 **Impact of the distance between a fixed-size reference and the validation set**

276 Here we tested the impact of an increase in distance between the reference and  
277 validation sets on the prediction performance of each model. To accomplish that, we  
278 considered 3 scenarios using generation 11 as validation as before: Using generations 4, 5,  
279 7, 8 and 9 as reference (NoGAP), using generations 4, 5, 7 and 8 as reference and omitting  
280 phenotypes from generation 9 (GAP9), using generation 4, 5 and 7 as reference and  
281 omitting phenotypes from generations 8 and 9 (GAP8+9). Considering the full dataset there  
282 were in total 638 animals from generations 4 to 9 available to be sampled for the validation  
283 subset. To analyze the proposed scenarios, the number of animals sampled for the  
284 reference subset was kept the same in all scenarios (N=300), with a constraint on the  
285 number of animals sampled from each generation to match its representativeness in NoGAP  
286 scenario (Supplementary Material - Table S2 for details). The fixed sample size of 300 was  
287 arbitrarily chosen based on the number of records available in GAP89, the scenario with the  
288 least available data to be sampled for the reference subset (N=345). Every scenario was  
289 evaluated in 20 replicates, inference was based on the average and standard deviation of  
290 accuracies obtained from replicates. All described models were applied to each of the 20  
291 replicates (in every scenario) considering the same sampled dataset in each replicate across  
292 models. The complete list of animals sampled in each of the 20 replicates used for the  
293 analyses is provided in the Supplementary Material.

294

## 295 ***Feature importance for dimensionality reduction***

296 For GBM, the importance of a feature is determined by assessing whether that  
297 feature was selected to split on during the tree building process, and the contribution of that  
298 to decrease the squared error (averaged over all trees) as a result (Friedman and Meulman,  
299 2003; Hastie, Tibshirani and Friedman, 2009). The feature importance is expressed in a  
300 percentage scale that can be ranked to assess the magnitude of importance of each feature.

301 Here we investigate if the feature importance performed by the GBM model can be  
302 used to improve performance by fitting only extracted relevant features, i.e., SNPs, in GBM  
303 or any of the other models. We considered the top 100, 250, 500 and 1000 features from a  
304 GBM model using the cross-validation strategy previously explained as input for GBLUP,  
305 ENET and GBM models. The important features were obtained using the same strategy  
306 described for the hyperparameter tuning previously explained, thus using a random split (80-  
307 20) within the reference subset (Figure 1).

308

### 309 ***Similarities among top SNPs and prediction rankings***

310 To assess the relationship between model's prediction at the animal level, we  
311 quantified the number of animals in common in the top 20 ranked animals (approximately top  
312 10% of generation 11) from each model. The latter metric gives an indication of the extent to  
313 which the same animals would be selected using these different models in a breeding  
314 program where each generation 10% of the animals are selected as parents of the next  
315 generation. Also, to understand the relationship between predictions from the models at the  
316 genome level, we quantified the overlap between the top 1000 ranked SNP among the  
317 models and traits analyzed. For any given trait, an "overlapping SNP" between two models A  
318 and B was defined as any SNP in the top 1000 ranked for model A identical or in high LD ( $r^2$   
319  $> 0.90$ ) with a SNP among the top 1000 ranked from model B. This approach may yield  
320 different results depending on one starting the comparison from model A to model B or vice  
321 versa and, therefore, here we report results for both directions.

322

### 323 **Data and software availability**

324 All data associated with this manuscript can be obtained at  
325 <https://figshare.com/s/8bdd723be9d0e748cadf>. The code developed and used to perform

326 analyzes described in this manuscript are included as Supplementary Material, as well as a  
327 detailed description of results. All software used is publicly available.

328

## 329 **RESULTS**

### 330 ***Model performance***

331 The accuracy of predicted phenotypes from GBLUP, BayesB, ENET and GBM for  
332 animals in the validation set (generation 11) is shown in Figure 2. The best performing model  
333 varied according to the trait being analyzed.

334 Prediction accuracies obtained for traditional linear models (GBLUP and BayesB)  
335 were, in general, proportional to the trait's heritability, with GBLUP overcoming BayesB for  
336 BMD, GLUC, INSUL, TRGL and UCRT. Predictive accuracy obtained with GBLUP was  
337 never the worst among tested models for any of the traits. The highest prediction accuracies  
338 were observed for body composition traits (BW10, BW15, BW20 and FATP), for which  
339 BayesB outperformed all other models. Conversely, BayesB particularly underperformed  
340 when analyzing GLUC which was one of the traits with the lowest overall accuracy across  
341 linear models. The ENET had lower prediction accuracy when compared to other models  
342 across traits. It was never the best performing model for a particular trait and showed the  
343 worst performance for BMD, BW10, BW15, BW20, INSUL and TRGL.

344

### 345 **FIGURE 2**

346

347 The GBM model showed best predictive performance for BMD, CHOL and GLUC.  
348 For other traits, prediction accuracy from GBM varied from being competitive to the linear  
349 models for BW10, BW15 and TRGL, to a poorer performance observed for UCRT. It only  
350 showed the worst predictive ability among all models for FATP, but with a small difference  
351 from the next performing model (- 1.76% absolute difference). The GBM model performed  
352 particularly well when analyzing GLUC, showing predictive performance much higher than

353 the linear models. Overall, GBM showed a less consistent pattern of predictive performance  
354 across trait categories when compared to the linear models.

355  
356 In terms of prediction error, GBLUP was the model with best performance for most  
357 traits, in most cases followed by GBM. The GBM model showed the lowest MSE for BMD,  
358 CHOL and GLUC. For all traits, BayesB showed the highest MSE when compared to other  
359 models, even for traits for which it had the best prediction accuracy. Relative differences  
360 between MSE from the best and worst model were lower for body weight traits (BW10,  
361 BW15 and BW20) and higher for CHOL and INSUL.

362

## 363 **TABLE 2**

364

### 365 ***Impact of feature selection on prediction performance***

366 Figure 3 shows the prediction accuracy obtained by GBLUP, ENET and GBM when  
367 fitting only the top 100, 250, 500, 1000 from a GBM run or all SNPs (52K). When compared  
368 to fitting all SNPs (SNPALL), fitting only a subset of important features showed distinct  
369 pattern depending on the trait analyzed and model applied.

370 When fitting the GBLUP model, including increasingly more important SNPs resulted,  
371 for most traits, in an incremental increase in accuracy, reaching its maximum value in the  
372 SNPALL scenario. This was especially the case for traits which were expected to be highly  
373 polygenic like BW10, BW15, BW20 and FATP. For CHOL, GLUC and INSUL, fitting GBLUP  
374 with a subset of top importance SNPs selected by the GBM model yielded higher accuracy  
375 than SNPALL, the number of top SNPs that resulted in the highest prediction accuracy was  
376 dependent on the trait being analyzed.

377 When fitting ENET, including subsets of relevant SNP as predictors for BW10, BW15  
378 and BW20 yielded similar results as for GBLUP. For FATP, there was an incremental  
379 increase in accuracy by including more important SNPs, but with SNP500 and SNP1000

380 showing even higher prediction accuracies than in SNPALL and comparatively higher than  
381 the accuracies obtained for FATP by GBLUP. For most other traits (except for BW10 and  
382 UCRT), fitting an ENET considering only some top SNPs showed higher prediction  
383 accuracies than SNPALL.

384 The GBM model showed for almost all traits a higher predictive accuracy when  
385 considering a subset of SNPs compared to fitting all available SNP (SNPALL). The only  
386 exception to that was UCRT, for which the inclusion of important SNPs up to 500 resulted in  
387 only a marginal increase in accuracy. For each tested subset of important SNPs, GBM  
388 outperformed GBLUP and ENET for prediction accuracy, except for FATP. For this trait,  
389 ENET yielded around 0.02 higher absolute accuracy than GBM for SNP1000. For BMD and  
390 UCRT, the total number of features selected by GBM was 364 and 419. Consequently, for  
391 these traits, running SNP1000 was not possible and SNP500 indicate SNP364 and SNP419,  
392 respectively.

393

394

### FIGURE 3

395

396

#### 397 **Generation gaps and connectedness between reference and validation sets**

398 Figure 4 shows the prediction accuracies obtained for different scenarios considering  
399 increasing distance between reference and validation sets. The increase in distance  
400 between the reference and validation sets resulted in a decrease in prediction accuracy for  
401 almost all trait/model combinations, in different magnitudes. The exception to that pattern  
402 was observed for GLU, for which a marginal increase in accuracy (although not drastically  
403 different across scenarios) was observed for GBLUP and GBM. Independent of the trait  
404 analyzed or model used, differences in accuracy between NoGAP and GAP9 were much  
405 lower than between NoGAP and GAP89 or between GAP9 and GAP89. These differences  
406 varied from - 0.20 (BMD – GBM) to +0.03 (GLUC – GBLUP).

407           The GBLUP model showed the lowest decrease in accuracy between NoGAP and  
408   GAP89 scenarios among traits when compared to other models, except for FATP, for which  
409   the difference in performance between NoGAP and GAP89 for GBLUP was the highest  
410   among all models (-0.12). On the other hand, the GBM model showed the highest drop in  
411   accuracy when comparing NoGAP and GAP89 scenario, especially for BMD, TRGL and  
412   UCRT. Especially for these traits, using GBM on a GAP89 scenario resulted in negative  
413   average prediction accuracies.

414           Independent of the model used, the traits BW10, BW15, BW20 and FATP showed  
415   the lowest decrease in accuracy while BMD, TRGL and UCRT showed the highest decrease  
416   in accuracy between NoGAP and GAP89 scenarios. For CHOL the prediction accuracy of  
417   GAP89 was higher than observed for GAP9 for all models tested, while for GLU this pattern  
418   was observed for predictions from GBLUP, BayesB and GBM, although in smaller  
419   differences between scenarios.

420           The ranking of model accuracy across traits observed using the full dataset (Figure  
421   2) and for the generation gap scenarios (Figure 4) was not the same. When considering the  
422   full dataset, GBM yielded the best accuracy for BMD, CHOL and GLU, however the same  
423   pattern was not observed for the generation gap scenarios. Overall, when under any of the  
424   generation gap scenarios, GBLUP had the best accuracy across traits.

425

426

#### FIGURE 4

427

428

#### 429 **Animal predictions and SNP ranking similarities between models**

430           The number of unique animals among the top 20 ranked using GBLUP, BayesB  
431   ENET and GBM models is shown in Figure 5 (top) for BW10 (A) and GLUC (B).

432   Respectively for these two traits, the number of unique animals in the top 20 rank was 4 and  
433   10 for GBLUP, 10 and 14 for BayesB, 7 and 9 for ENET; and 7 and 11 for GBM. Detailed



434 results for all traits are included in Supplementary Material – Figure S2. Overall, the number  
435 of overlapping animals between pairs and triples of models was slightly higher for BW10  
436 than for GLUC. The number of animals uniquely in common between any model and GBM  
437 varied between 0 and 4 for BW10 and between 0 and 3 for GLUC.

438 Figure 5 also shows the count of overlapping markers among the top 1000 ranked by  
439 the models investigated for BW10 (C) and GLUC (D). Overall, the number of overlapping  
440 markers between any pair of models was higher for BW10 than for GLUC. Within traits,  
441 higher values were usually observed for comparisons between two linear models than  
442 between a linear model and GBM, while the lowest overlap was observed between ENET  
443 and GBM; and between BayesB and GBM. Comparisons between GBLUP and any other  
444 model had more overlapping markers than between other models. The largest differences  
445 between values above diagonal and the respective comparison below diagonal were  
446 observed for comparisons between GBLUP and any other model, with values above the  
447 diagonal (GBLUP x other model) being considerably higher than values below the diagonal  
448 (other model x GBLUP).

449

450

## FIGURE 5

451

## DISCUSSION

453 In the present study we compared predictive performances of commonly applied  
454 linear methods (GBLUP, BayesB and ENET) and a non-parametric machine learning  
455 ensemble method (GBM) for GP of 10 complex phenotypes in the DO mouse population.  
456 Although the evaluation of feasibility of genomic selection in mice was not our focus, results  
457 of predictive accuracy can be used as a guide if selection is intended for this population.  
458 Currently, the mating scheme used for the DO population is a randomized outbreeding  
459 strategy (Churchill et al., 2012), however, being able to predict phenotypes could be useful if  
460 any directional selection is of interest in the future.

461 Accuracies of GP have been reported by previous authors in another mice population  
462 (Legarra et al., 2008; Lee et al., 2008). Overall results showed low to medium predictive  
463 accuracies, ranging from 0.10 to 0.65 depending on the trait analyzed and cross-validation  
464 strategy considered. Our results confirmed that the performance of genomic prediction  
465 methods seem to be highly dependent on the trait's genetic architecture. When analyzing the  
466 traits that are mostly polygenic (BW10, BW15, BW20, FATP and TRGL), linear models were  
467 able to outperform GBM in both the full dataset (Figure 1) and for scenarios with lower  
468 connectedness between reference and validation subsets (Figure 4). BayesB was the best  
469 model for the three BW traits and FATP, while GBLUP had the best results for TRGL. In a  
470 genome-wide study using data from the same population, Zhang et al. (2010) showed an  
471 absence of QTL with pronounced effects for TRGL, with mostly small effects detected for  
472 genome-wide markers. This could explain why GBLUP had better predictive performance  
473 than BayesB or ENET for this trait.

474 Among the ten traits analyzed, evidence of non-additive effects has been reported for  
475 BMD (Tyller et al. (2016), CHL (Stewart et al., 2010; Li and Churchill, 2010) and GLU  
476 (Stewart et al., 2010; Chen et al., 2017). Coincidentally for these traits GBM showed a better  
477 predictive performance than the linear models in the full dataset. Based on their results in  
478 strawberry using convolution neural networks, Zingaretti et al. (2020) suggested that  
479 machine learning methods may outperform parametric and semi-parametric models when  
480 the epistatic component is relevant (proportionally to the additive genetic variance) and  
481 narrow-sense heritability is medium to low (below 0.35). This is roughly in line with our  
482 results for CHL ( $h^2 = 0.33$ ), GLU ( $h^2 = 0.11$ ) and BMD ( $h^2 = 0.39$ ). Interestingly, in our results  
483 the superiority of predictive ability from GBM compared to the parametric models was higher  
484 for the trait with lower heritability (GLU) than for CHL and BMD. Low-heritability traits imply  
485 that a smaller portion of observed variance is explained by the additive component, and  
486 therefore, any other non-linear effects might explain proportionally more of the phenotypic  
487 variance than in high-heritability traits. This larger proportion of the phenotypic variance with

488 a non-linear origin can more easily be captured by the GBM model, increasing performance  
489 of the model for such traits. Overall, the observed ranking of model performance across  
490 anticipated trait architecture was in line with previously reported results. In a detailed  
491 simulation study, Abdolahi-Arpanahi et al. (2020) showed that for traits controlled by many  
492 QTL (1000) with only additive effects, GBLUP and BayesB outperformed any machine  
493 learning approach, while for traits controlled by a small number of QTL (100) with non-  
494 additive effects, GBM largely outperformed other parametric and non-parametric models.  
495 Note that in their study, traits were simulated with only additive or non-additive effects, which  
496 is not expected to be the case in real world situations. However, their results on these  
497 extreme cases, are a robust indication of what to expect from each type of genomic  
498 prediction model. The similarity between results obtained in the present- and the afore-  
499 mentioned studies are in line with the current knowledge of genetic architecture of the  
500 analyzed traits (Table 1).

501         The efficient built-in feature extraction from GBM enables pre-screening of SNPs  
502 (Lubke et al., 2013; Li et al., 2018); and, therefore, minimize the loss in accuracy when  
503 reducing the number of markers in a genotype panel. The performance of GBM on pre-  
504 selection of informative SNP markers varied across traits and models subsequently used for  
505 phenotype prediction. When considering the highly polygenic traits (BW10, BW15, BW20,  
506 FATP and TRGL), using pre-selected SNP markers generally decreased accuracy of  
507 GBLUP. However, for ENET and GBM, in certain situations a subset of pre-selected SNP  
508 tended to yield higher predictive accuracy than using the complete SNP panel (Figure 3). For  
509 traits with evidence of non-linear effects (BMD, CHL and GLU), a similar pattern was  
510 observed, with the difference that the use of subsets of markers more commonly resulted in  
511 higher predictive accuracy than when fitting the models with all available SNP. After pre-  
512 selection of informative markers, GBM showed the biggest gains in accuracy across traits  
513 and models, which is expected, since we used a GBM model to accomplish the former.  
514 Azodi et al. (2019) observed that feature selection (using the random forest method) notably

515 improved prediction accuracies when using artificial neural networks (ANN) in multiple plant  
516 species. However, in their case, predictive accuracies using ANN were overall lower than  
517 other models. Using data from Brahman cattle, Li et al. (2018) investigated the potential of  
518 three different ensemble learning methods to pre-select SNPs and showed that GBLUP  
519 accuracies using SNPs preselected with GBM in some cases were actually similar to  
520 accuracies based on all SNPs. Together with our findings, the above-mentioned results  
521 suggest that GBM can be used for pre-screening informative markers, even when further  
522 genomic prediction is performed using traditional linear models, such as GBLUP. One  
523 limitation of ours and all investigations found in literature is the focus in performing feature  
524 selection and further fitting top relevant markers into univariate models. Further research is  
525 needed to expand this from a univariate to multivariate approach for practical implementation  
526 in genomic selection breeding programs.

527 Curiously, for UCRT the inclusion of pre-selected SNP (from 100 to 500) did not  
528 affect predictive accuracy, which was similar across scenarios and models, but always lower  
529 than using the full SNP panel. This may occur because the optimum number of informative  
530 markers might be above 500 or just that GBM was not successful at pre-selecting  
531 informative markers for this particular trait. A similar pattern was previously reported by  
532 Azodi et al. (2019) when fitting different numbers of informative pre-selected markers into a  
533 model for genomic prediction in sorghum. Authors observed low and stable prediction  
534 accuracy (around 0.40) when using up to 5% of top markers, but a strong increase when  
535 using more than 5% of top relevant markers, reaching up to 0.60 when using 80% of  
536 available markers. We have replicated the feature selection of top 100, 250, 500 and 1000  
537 SNPs using BayesB instead of GBM. Results suggest a superiority of GBM for pre-selecting  
538 informative markers (Supplementary Material – Figure S1) as predictive accuracy across  
539 traits was consistently lower when using BayesB compared to using GBM for the same task.

540 The size of the reference population and the strength of the connectedness between  
541 reference and validation subsets have been shown to influence GP accuracies from linear

542 models (Habier et al., 2007; Wientjes et al., 2013; Liu et al., 2015). In terms of  
543 connectedness, maximizing predictive performance involves maximizing connectedness  
544 between reference and validation populations, while simultaneously minimizing  
545 connectedness within the reference population (Pszczola et al., 2012). Although extensive  
546 research has been done over this topic regarding traditional GP using parametric models,  
547 this is not the case for ML models. In addition to that, much has been discussed in literature  
548 about how “data-hungry” machine learning models could be. However, studies have not only  
549 shown no clear superiority of predictive performance from machine learning over parametric  
550 models when using large datasets (Bellot et al., 2018), but also good performance of the  
551 same machine learning models when using datasets of hundreds of individuals (Azodi et al.,  
552 2019; Zingaretti et al., 2020; Bargelloni et al., 2021). When compared to the predictive  
553 performance of linear models, GBM had competitive results for most traits and a superior  
554 performance for BMD, CHL and GLU when using the full dataset (Figure 2). However, this  
555 relatively good performance was not maintained for NoGAP, GAP9 and GAP89 scenarios  
556 that contained less data (Figure 4). This pattern was observed across all traits and scenarios  
557 and may indicate that using only 300 individuals in the reference subset affected more  
558 drastically the predictive performance of the GBM model than GBLUP, BayesB or ENET.  
559 Overall, the decrease in accuracy observed from NoGAP to GAP89 was also more severe  
560 for GBM than for other models. We hypothesize that this could happen because as the  
561 distance between reference and validation populations increases, the frequency of  
562 recombination events also increases between genotypes from individuals in the two subsets.  
563 As GBM implicitly fits SNPxSNP interactions, the increased number of recombinations will  
564 impair the accurate estimation of allele combinations and interactions.

565         The ultimate aim of genomic prediction in the breeding context is to make accurate  
566 selection decisions early in the animal’s life. Therefore, comparing the top ranked individuals  
567 between methods is a useful way to understand how different these are in practical terms. In  
568 the present study, independent of the trait analyzed, linear models shared many more

569 individuals among the top 20 best from the three models (GBLUP, BayesB and ENET) than  
570 with GBM. For GLUC, for which we expected non-additive effects, the similarity between  
571 rankings for linear models was lower, while the number of unique animals for a single model  
572 were higher. On the other hand, as we consider BW10 to be controlled mostly by additive  
573 effects, the absence of relevant non-additive effects is probably the cause of lesser  
574 differences between linear models and GBM regarding selection decisions.

575         We evaluated the overlap among top ranked SNP between the different models  
576 (Figure 5, Supplementary Material – Figure S3). One thing that must be acknowledged is  
577 that there are differences in the way each of the different models estimate the relevance of a  
578 single SNP. This may affect the comparison of the overlapping relevant genomic regions  
579 between methods for a certain trait. For the linear models, SNP relevance is based on  
580 changes observed at the phenotypic level by the change in allelic dosage (0,1,2), while for  
581 GBM a SNP is considered relevant when the inclusion of this SNP in the decision tree  
582 contributes to a reduction in prediction error, and this can be affected by other SNP also  
583 used in the same decision tree. On the other hand, when used for genomic prediction, these  
584 differences will impact the obtained genomic predictions and thereby indirectly impact  
585 selection decisions. Therefore, this simple comparison of SNP ranks is informative to  
586 understand the similarity of outcomes from different models.

587         The asymmetry of results obtained from the overlapping top ranked SNP between  
588 models can be seen comparing values below and above diagonals in Figure 5 (C and D).  
589 The strongest driver of the differences observed seems to be the ability of models to perform  
590 variable selection. When starting comparisons from GBLUP (first row above diagonals in  
591 Figure 5 - C and D), there were many SNP located in specific short genomic regions among  
592 the top 1000 ranked SNP for this model. Several top markers from GBLUP were in high LD  
593 with at least one top ranked marker from the other models. In contrast, the variable selection  
594 applied by BayesB, ENET and GBM, resulted in fewer SNPs within a given genomic region  
595 to be among the top ranked ones. As a consequence, the number of top ranked SNP in high

596 LD with top ranked SNPs from the other models was much lower. Therefore, the difference  
597 between values above and below diagonal are directly related to the difference in magnitude  
598 of penalization applied to markers between any given pair of models. When comparing  
599 results from genomic prediction of height in maize using BayesA, ENET and random forest  
600 models, Azodi et al. (2019) have observed marked dissimilarity among the top 8000  
601 markers. Results showed that BayesA and ENET shared 1589 (20%) markers, while RF  
602 shared 328 (4%) markers with BayesA and 475 (6%) with ENET. In the present study, this  
603 higher similarity among SNP ranks between linear models in addition to much lower  
604 similarity between linear models and an ensemble machine learning model (random forest in  
605 Azodi et al. [2019] or GBM in the present study) was also observed for BW10. At the same  
606 time, the difference between average SNP overlaps between two linear models or between a  
607 linear model and GBM was much lower for GLUC. From these results we can hypothesize  
608 that linear models have similar SNP rankings for polygenic traits because the underlying  
609 genetic architecture is in line with assumptions and parametrization considered in such  
610 models, while the presence of non-linear effects is probably captured differently by the  
611 distinct linear models, generating the observed overall dissimilarity.

612

## 613 **CONCLUSION**

614 Gradient boosting machine had a competitive performance for genomic prediction of  
615 complex phenotypes in mouse specifically for traits with non-additive effects where it can  
616 outperform linear models. The gradient boosting machine was more affected by datasets  
617 with less data points and by decrease in relationship between reference and validation  
618 populations than linear models. Considerable differences between the top ranked animals  
619 suggest that using linear models versus GBM will result in clear differences in selection  
620 decisions. The built-in feature selection from GBM seems beneficial to extract a smaller  
621 number of informative markers and in some cases can improve accuracies even when  
622 parametric models are used for prediction.

623

624 **FUNDING**

625 This project received funding from the European Union's Horizon 2020 research and  
626 innovation programme under grant agreement no. 817998.

627

628

629

630

631

632

633

634

635

636

637

638

639

640

641

642

643

644



## 645 REFERENCES

- 646 Abdollahi-Arpanahi, R., Gianola, D., and Peñagaricano, F. (2020) Deep learning versus  
647 parametric and ensemble methods for genomic prediction of complex phenotypes. *Genet.*  
648 *Sel. Evol.* 52, 12, <https://doi.org/10.1186/s12711-020-00531-z>.
- 649 Azodi, C.B., Bolger, E., McCarren, A., Roantree, M., de los Campos, G., and Shiu, S.H.  
650 (2019). Benchmarking algorithms for genomic prediction of complex traits. *G3 (Bethesda)* 9,  
651 3691–3702, <https://doi.org/10.1101/614479>.
- 652 Bargelloni L., Tassiello O., Babbucci M., Ferrareso S., Franch R., Montanucci L., Carnier P.  
653 (2021). Data imputation and machine learning improve association analysis and genomic  
654 prediction for resistance to fish photobacteriosis in the gilthead sea bream. *Aquaculture*  
655 *Reports*, Volume 20, 100661. <https://doi.org/10.1016/j.aqrep.2021.100661>
- 656 Barrera-Saldaña, Hugo A. (2019). Origin of personalized medicine in pioneering, passionate,  
657 genomic research. *Genomics*, 112-1, January 2020, p. 721-728.  
658 doi:10.1016/j.ygeno.2019.05.006
- 659 Bhat, J.A., Ali, S.; Salgotra, R.K., Mir, Z.A.; Dutta, S., Jadon, V.; Tyagi, A., Mushtaq, M.,  
660 Jain, N.; Singh, P.K., Singh, G.P., Prabhu, K.V. (2016). *Genomic Selection in the Era of Next*  
661 *Generation Sequencing for Complex Traits in Plant Breeding. Frontiers in Genetics*, 7().  
662 doi:10.3389/fgene.2016.00221
- 663 Boichard D., Ducrocq V., Croiseau P., Fritz S. (2016) Genomic selection in domestic  
664 animals: Principles, applications and perspectives. *C R Biol.* Jul-Aug;339(7-8):274-7. doi:  
665 10.1016/j.crv.2016.04.007. Epub 2016 May 13. PMID: 27185591.
- 666 Broman K.W., Gatti D.M., Simecek P., Furlotte N.A., Prins P., Sen Ś., Yandell B.S., Churchill  
667 G.A. (2018). R/qtl2: software for mapping quantitative trait loci with high-dimensional data  
668 and multi-parent populations. *Genetics* 211:495-502 doi:10.1534/genetics.118.301595
- 669 Calus, M.P.L. (2010). *Genomic breeding value prediction: methods and procedures. animal*,  
670 4(2), 157–. doi:10.1017/S1751731109991352
- 671 Canty A., Ripley B.D. (2021). *boot: Bootstrap R (S-Plus) Functions*. R package version 1.3-  
672 28.
- 673 Chitre, A.S., Polesskaya, O., Holl, K., Gao, J., Cheng, R., Bimschleger, H., Garcia M., Angel;  
674 G.T., Gileta, A.F., Han, W., Horvath, A., Hughson, A., Ishiwari, K., King, C.P., Lamparelli, A.,  
675 Versaggi, C.L., Martin, C., St. Pierre, C.L., Tripi, J.A., Wang, T., Chen, H., Flagel, S.B.,  
676 Meyer, P., Richards, J., Robinson, T.E., Palmer, A.A., Solberg W., Leah C.  
677 (2020). *Genome • Wide Association Study in 3,173 Outbred Rats Identifies Multiple Loci*  
678 *for Body Weight, Adiposity, and Fasting Glucose. Obesity, ()*,  
679 *oby.22927*. doi:10.1002/oby.22927
- 680 Churchill G.A., Gatti D.M., Munger S.C., Svenson K.L. (2012). The Diversity Outbred mouse  
681 population. *Mamm Genome.* 2012 Oct;23(9-10):713-8. doi: 10.1007/s00335-012-9414-2.  
682 Aug 15. PMID: 22892839; PMCID: PMC3524832.
- 683 Click, C., Lanford, J., Malohlava, M., Parmar, V., and Roark, H. (2016). *Gradient Boosted*  
684 *Models with H2O*. <http://docs.h2o.ai/h2o/latest-stable/h2o-docs/booklets/GBMBooklet.pdf>.
- 685 Davison, A.C., Hinkley, D.V. (1997). *Bootstrap Methods and Their Applications*. Cambridge  
686 University Press, Cambridge. ISBN 0-521-57391-2, <http://statwww.epfl.ch/davison/BMA/>.

- 687 Duncan, L., Shen, H., Gelaye, B. *et al.* (2019) Analysis of polygenic risk score usage and  
688 performance in diverse human populations. *Nat Commun* **10**, 3328.  
689 <https://doi.org/10.1038/s41467-019-11112-0>
- 690 Forsberg S.K.G., Bloom J.S., Sadhu M.J., Kruglyak L., Carlborg Ö. (2017) Accounting for  
691 genetic interactions improves modeling of individual quantitative trait phenotypes in yeast.  
692 *Nat Genet.* 2017;49:497–503
- 693 Freund, Y., Schapire, R., & Abe, N. (1999). A short introduction to boosting. *Journal-*  
694 *Japanese Society for Artificial Intelligence*, 14(771-780), 1612.
- 695 Friedman J.H. (2001). Greedy function approximation: a gradient boosting machine. *Ann*  
696 *Statist.*; 29:1189–232.
- 697 Friedman, J. H. (2002). Stochastic gradient boosting. *Computational statistics & data*  
698 *analysis*, 38(4), 367-378.
- 699 Friedman, J.H. & Meulman, J.J. (2003). Multiple additive regression trees with application in  
700 epidemiology. *Statistics in Medicine*, 22, 1365–1381.
- 701 Friedman J, Hastie T, Tibshirani. (2010). R: Regularization paths for generalized linear  
702 models via coordinate descent. *Journal of Statistical software*, 33:1-22
- 703 Gatti D.M., Svenson K.L., Shabalin A., Wu L.Y., Valdar W., Simecek P., Goodwin N., Cheng  
704 R., Pomp D., Palmer A., Chesler E.J., Broman K.W., Churchill G.A. (2014). Quantitative trait  
705 locus mapping methods for diversity outbred mice. *G3 (Bethesda)*. Sep 18;4(9):1623-33. doi:  
706 10.1534/g3.114.013748. PMID: 25237114; PMCID: PMC4169154.
- 707 Ghafouri-Kesbi F., Rahimi-Mianji G., Honarvar M., Nejati-Javaremi A. (2016) Predictive  
708 ability of Random Forests, Boosting, Support Vector Machines and Genomic Best Linear  
709 Unbiased Prediction in different scenarios of genomic evaluation. *Animal Production*  
710 *Science* **57**, 229-236.
- 711 González-Recio O.; Jiménez-Montero J.A.; Alenda R. (2013). *The gradient boosting*  
712 *algorithm and random boosting for genome-assisted evaluation in large data sets.* 96(1).  
713 doi:10.3168/jds.2012-5630
- 714 González-Recio O., Rosa G.J.M., Gianola D. (2014). *Machine learning methods and*  
715 *predictive ability metrics for genome-wide prediction of complex traits.* *Livestock Science*,  
716 166(), 217–231. doi:10.1016/j.livsci.2014.05.036
- 717 Gonzalez-Recio O, Forni S. (2011). Genome-wide prediction of discrete traits using  
718 Bayesian regressions and machine learning. *Genet Sel Evol.*, 43:7.
- 719 Grinberg, N.F., Orhobor, O.I. & King, R.D.(2020). An evaluation of machine-learning for  
720 predicting phenotype: studies in yeast, rice, and wheat. *Mach Learn* **109**, 251–277.  
721 <https://doi.org/10.1007/s10994-019-05848-5>
- 722 Habier D., Fernando R. L. and Dekkers J. C. M. (2007). The Impact of Genetic Relationship  
723 Information on Genome-Assisted Breeding Values. *GENETICS* December 1, 2007 vol. 177  
724 no. 4 2389-2397; <https://doi.org/10.1534/genetics.107.081190>
- 725 Hastie, T., Tibshirani, R., & Friedman, J. (2009). *The elements of statistical learning: data*  
726 *mining, inference, and prediction.* Springer Science & Business Media.
- 727 Hoerl A, Kennard R. (1970). Ridge Regression: Applications to Nonorthogonal  
728 Problems. *TECHNOMETRICS* 1970;12:69–82

- 729 Howard, R., Carriquiry, A. L., and Beavis, W. D. (2014). Parametric and non-parametric  
730 statistical methods for genomic selection of traits with additive and epistatic genetic  
731 architectures. *G3 (Bethesda)* 4, 1027–1046. doi: 10.1534/g3.114.010298
- 732 Keller M.P., Rabaglia M.E., Schueler K.L., Stapleton D.S., Gatti D.M., Vincent M., Mitok K.A.,  
733 Wang Z., Ishimura T., Simonett S.P., Emfinger C.H., Das R., Beck T., Kendziorski C.,  
734 Broman K.W., Yandell B.S., Churchill G.A., Attie A.D. (2019). Gene loci associated with  
735 insulin secretion in islets from non-diabetic mice. *J Clin Invest.* Jul 25;129(10):4419-4432.  
736 doi: 10.1172/JCI129143. PMID: 31343992; PMCID: PMC6763251
- 737 Jiang, R., Tang, W., Wu, X. *et al.* (2009). A random forest approach to the detection of  
738 epistatic interactions in case-control studies. *BMC Bioinformatics* **10**, S65.  
739 <https://doi.org/10.1186/1471-2105-10-S1-S65>
- 740 Jiménez-Montero J.A.; González-Recio O.; Alenda R. (2013). *Comparison of methods for*  
741 *the implementation of genome-assisted evaluation of Spanish dairy cattle.* 96(1).  
742 doi:10.3168/jds.2012-5631
- 743 Lappalainen T., Scott A. J., Brandt M., Hall I.M.. (2019). Genomic Analysis in the Age of  
744 Human Genome Sequencing. *Cell*, Volume 177, Issue 1, 2019, Pages 70-84.
- 745 Li, Bo; Zhang, Nanxi; Wang, You-Gan; George, Andrew W.; Reverter, Antonio; Li, Yutao  
746 (2018). *Genomic Prediction of Breeding Values Using a Subset of SNPs Identified by Three*  
747 *Machine Learning Methods.* *Frontiers in Genetics*, 9(), 237–. doi:10.3389/fgene.2018.00237
- 748 Li, R. H., & Churchill, G. A. (2010). Epistasis contributes to the genetic buffering of plasma  
749 HDL cholesterol in mice. *Physiological genomics*, 42A(4), 228–234.  
750 <https://doi.org/10.1152/physiolgenomics.00044.2010>
- 751 Lubke, G. H., Laurin, C., Walters, R., Eriksson, N., Hysi, P., Spector, T. D., et al. (2013).  
752 Gradient boosting as a SNP Filter: an evaluation using simulated and hair morphology  
753 data. *J. Data Min. Genomics Proteomics* 4:143. doi: 10.4172/2153-0602.1000143
- 754 Mackay, T., Stone, E. & Ayroles, J. (2009) The genetics of quantitative traits: challenges and  
755 prospects. *Nat Rev Genet* 10, 565–577. <https://doi.org/10.1038/nrg2612>
- 756 Mackay, T.F.C. (2014). Epistasis and quantitative traits: using model organisms to study  
757 gene–gene interactions. *Nat Rev Genet.* 2014; 15:22–33.
- 758 Meuwissen, T.H., Hayes B.J., and Goddard M. E. (2001) Prediction of total genetic value  
759 using genome-wide dense marker maps. *Genetics* 157: 1819–1829.
- 760 Montesinos-López, O.A., Montesinos-López, A., Pérez-Rodríguez, P. *et al.* (2021). A review  
761 of deep learning applications for genomic selection. *BMC Genomics* 22, 19.  
762 <https://doi.org/10.1186/s12864-020-07319-x>
- 763 Moore K.J., Nagle D.L. (2000). Complex trait analysis in the mouse: The strengths, the  
764 limitations and the promise yet to come. *Annu Rev Genet.* 34:653-686.
- 765 Morgan A.P., Fu C.P., Kao C.Y., Welsh C.E., Didion J.P., et al. (2016). The Mouse  
766 Universal Genotyping Array: from substrains to subspecies. *G3 (Bethesda)* 6: 263–279.  
767 10.1534/g3.115.022087
- 768 Nayeri S., Sargolzaei M., Tulpan D. (2019) A review of traditional and machine learning  
769 methods applied to animal breeding. *Anim Health Res Rev.* 2019 Jun;20(1):31-46. doi:  
770 10.1017/S1466252319000148. PMID: 31895018.

- 771 Neves, H.H., Carvalheiro, R. & Queiroz, S.A. (2012). A comparison of statistical methods for  
772 genomic selection in a mice population. *BMC Genet* **13**, 100. [https://doi.org/10.1186/1471-](https://doi.org/10.1186/1471-2156-13-100)  
773 2156-13-100
- 774 Pérez P. and de los Campos G. (2014) Genome-wide regression and prediction with the  
775 BGLR statistical package. *Genetics*.198(2):483-495. doi:10.1534/genetics.114.164442
- 776 Pszczola, M., T. Strabel, H. A. Mulder, and M. P. L. Calus. (2012). Reliability of direct  
777 genomic values for animals with different relationships within and to the reference  
778 population. *J. Dairy Sci.* 95(1):389-400.
- 779 Rau C.D., Parks B., Wang Y., et al. (2015). High-Density Genotypes of Inbred Mouse  
780 Strains: Improved Power and Precision of Association Mapping. *G3 (Bethesda)*.  
781 2015;5(10):2021-2026. Published 2015 Jul 28. doi:10.1534/g3.115.020784
- 782 Sackton TB, Hartl DL. (2016) Genotypic Context and Epistasis in Individuals and  
783 Populations. *Cell.*, 166(2):279-287. <https://doi.org/10.1016/j.cell.2016.06.047>
- 784 Srivastava, S., Lopez, B.I., Kumar, H., Jang, M., Chai, H.H., Park, W., Park, J.E., Lim, D.  
785 (2021). Prediction of Hanwoo Cattle Phenotypes from Genotypes Using Machine Learning  
786 Methods. *Animals*, 11, 2066. <https://doi.org/10.3390/ani11072066>
- 787 Stewart, T.P., Kim, H.Y., Saxton, A.M. *et al.* (2010) Genetic and genomic analysis of  
788 hyperlipidemia, obesity and diabetes using (C57BL/6J × TALLYHO/JngJ) F2 mice. *BMC*  
789 *Genomics* **11**, 713. <https://doi.org/10.1186/1471-2164-11-713>
- 790 Svenson K.L., Gatti D.M., Valdar W., Welsh C.E., Cheng R., Chesler E.J., Palmer A.A.,  
791 McMillan L., Churchill G.A. (2012) High-resolution genetic mapping using the Mouse  
792 Diversity outbred population. *Genetics*. Feb;190(2):437-47. doi:  
793 10.1534/genetics.111.132597. PMID: 22345611; PMCID: PMC3276626.
- 794 Tyler A.L., Donahue L.R., Churchill G.A., Carter G.W.. Weak Epistasis Generally Stabilizes  
795 Phenotypes in a Mouse Intercross. *PLoS Genet*. 2016 Feb 1;12(2):e1005805. doi:  
796 10.1371/journal.pgen.1005805. PMID: 26828925; PMCID: PMC4734753.
- 797 Tyler A.L., Ji B., Gatti D.M., Munger S.C., Churchill G.A., Svenson K.L., Carter G.W. (2017).  
798 Epistatic Networks Jointly Influence Phenotypes Related to Metabolic Disease and Gene  
799 Expression in Diversity Outbred Mice. *Genetics*. Jun;206(2):621-639. doi:  
800 10.1534/genetics.116.198051. PMID: 28592500; PMCID: PMC5499176.
- 801 Van Dijk A.D.J., Kootstra, G., Kruijer, W., de Ridder, D. (2021). Machine learning in plant  
802 science and plant breeding. *iScience* 24, 101890, January 22.
- 803 Van Raden, P.M. (2008). Efficient methods to compute genomic predictions. *J. Dairy Sci.*  
804 91:4414-4423. <https://doi.org/10.3168/jds.2007-0980>
- 805 Yang, H., J.R. Wang, J.P. Didion, R.J. Buus, T.A. Bell et al. (2011) Subspecific origin and  
806 haplotype diversity in the laboratory mouse. *Nat. Genet.* 43: 648–655.
- 807 Wientjes, Y.C.J.; Veerkamp, R.F.; Calus, M.P.L. (2013). *The Effect of Linkage Disequilibrium*  
808 *and Family Relationships on the Reliability of Genomic Prediction*. *Genetics*, 193(2), 621–  
809 631. doi:10.1534/genetics.112.146290
- 810 Zhang W., Korstanje R., Thaisz J., Staedtler F., Harttman N., Xu L., Feng M., Yanas L.,  
811 Yang H., Valdar W., Churchill G. A. and DiPetrillo K. (2012). Genome-Wide Association  
812 Mapping of Quantitative Traits in Outbred Mice. *G3: GENES, GENOMES, GENETICS*  
813 February 1, vol. 2 no. 2 167-174; <https://doi.org/10.1534/g3.111.001792>

814 Zou H, Hastie T. (2005). Regularization and variable selection via the elastic net. Journal of  
815 the Royal Statistical Society B, 67:301-320

816 Zingaretti, L. M., S. A. Gezan, L. F. V. Ferrao, L. F. Osorio, A. Monfort, P. R. Muñoz, V. M.  
817 Whitaker, and M. Perez-Enciso. (2020). Exploring deep learning for complex trait genomic  
818 prediction in polyploid outcrossing species. *Frontiers in plant science*, 11: 25. Doi:  
819 [10.3389/fpls.2020.00025](https://doi.org/10.3389/fpls.2020.00025)

820

821

822

823

824

825

826

827

828

829

830

831

832

833

834

835

836

837

838

839

840

841

842

843

844

845 **Table 1.** Number of available observations (N), estimated heritability, assumptions from  
 846 literature regarding the genetic architecture of the trait and references.

| Trait | N   | Heritability | Genetic Architecture                                  | Reference                                                                               |
|-------|-----|--------------|-------------------------------------------------------|-----------------------------------------------------------------------------------------|
| BMD   | 831 | 0.39         | Evidence of epistatic effects                         | Tyller <i>et al.</i> (2016)                                                             |
| BW10  | 834 | 0.42         | Highly polygenic                                      | Tyller <i>et al.</i> (2017)<br>Chitre <i>et al.</i> (2018)                              |
| BW15  | 829 | 0.34         | Highly polygenic                                      | Tyller <i>et al.</i> (2017)<br>Chitre <i>et al.</i> (2018)                              |
| BW20  | 827 | 0.37         | Highly polygenic                                      | Tyller <i>et al.</i> (2017)<br>Chitre <i>et al.</i> (2018)                              |
| FATP  | 831 | 0.44         | Highly polygenic                                      | Tyller <i>et al.</i> (2017)                                                             |
| CHOL  | 819 | 0.33         | QTL with high effect<br>Evidence of epistatic effects | Stewart <i>et al.</i> , (2010)<br>Li and Churchill (2010)<br>Zhang <i>et al.</i> (2012) |
| GLUC  | 816 | 0.12         | Evidence of epistatic effects                         | Stewart <i>et al.</i> (2010)<br>Chen <i>et al.</i> (2017)                               |
| INSUL | 820 | 0.21         | QTL with high effect                                  | Keller <i>et al.</i> (2019)                                                             |
| TRGL  | 820 | 0.29         | Highly polygenic                                      | Stewart <i>et al.</i> (2010)                                                            |
| UCRT  | 799 | 0.13         | Highly polygenic<br>Evidence of dominance effects     | Perry (2019)                                                                            |

847 <sup>1</sup> Standard error was close to 0.08 for all traits.

848

849

850

851

852

853

854

855

856

857

858

859

860

861

862

863 **Table 2.** Prediction error (mean squared error) obtained from GBLUP, BayesB, ENET and  
864 GBM for 10 phenotypes analyzed in the diversity outbred mouse population. Per trait, the  
865 lowest values are indicated in bold.

| Trait <sup>1</sup> | GBLUP        | BayesB | ENET  | GBM          |
|--------------------|--------------|--------|-------|--------------|
| BMD                | 0.886        | 0.929  | 0.904 | <b>0.885</b> |
| BW10               | <b>0.023</b> | 0.029  | 0.025 | 0.024        |
| BW15               | <b>0.025</b> | 0.030  | 0.026 | 0.025        |
| BW20               | <b>0.029</b> | 0.033  | 0.030 | 0.030        |
| CHOL               | 0.068        | 0.104  | 0.080 | <b>0.066</b> |
| FATP               | <b>0.486</b> | 0.523  | 0.488 | 0.493        |
| GLUC               | 0.054        | 0.061  | 0.056 | <b>0.051</b> |
| TRGL               | <b>1.339</b> | 1.503  | 1.373 | 1.367        |
| INSUL              | <b>0.198</b> | 0.261  | 0.233 | 0.202        |
| UCRT               | <b>0.019</b> | 0.022  | 0.020 | 0.020        |

866 <sup>1</sup>Bone mineral density at 12 weeks (BMD), Body weight at 10, 15 and 20 weeks (BW10,  
867 BW15 and BW20); circulating cholesterol at 19 weeks (CHOL), adjusted body fat percentage  
868 at 12 weeks (FATP), circulating glucose at 19 weeks (GLU), circulating triglycerides at 19  
869 weeks (TRGL), circulating insulin at 8 weeks (INSUL) and urine creatinine at 20 weeks  
870 (UCRT)

871

872

873

874

875

876

877

878

879

880

881

882

883

884

885

## 886 FIGURES DESCRIPTION

887

888 **Figure 1.** Graphical representation of the hyper-parameter tuning grid-search scheme  
889 implemented to obtain the best GBM and ENET models.

890

891 **Figure 2.** Prediction accuracy, including standard errors, obtained from GBLUP, BayesB,  
892 elastic net (ENET) and gradient boosting machine (GBM) for the traits: *bone mineral density*  
893 *at 12 weeks (BMD)*, *Body weight at 10, 15 and 20 weeks (BW10, BW15 and BW20)*;  
894 *circulating cholesterol at 19 weeks (CHOL)*, *adjusted body fat percentage at 12 weeks*  
895 *(FATP)*, *circulating glucose at 19 weeks (GLUC)*, *circulating triglycerides at 19 weeks*  
896 *(TRGL)*, *circulating insulin at 8 weeks (INSUL)* and *urine creatinine at 20 weeks (UCRT)*.

897

898 **Figure 3.** Prediction accuracy, including standard errors, for the analyzed traits for GBLUP  
899 (top), ENET (mid) and GBM (bottom) fitting exclusively the top 100 (SNP100), 250  
900 (SNP250), 500 (SNP500), 1000 (SNP1000) ranked by a gradient boosting machine (GBM)  
901 model and fitting all SNPs (SNPALL). *Traits: Bone mineral density at 12 weeks (BMD)*, *Body*  
902 *weight at 10, 15 and 20 weeks (BW10, BW15 and BW20)*; *circulating cholesterol at 19*  
903 *weeks (CHOL)*, *adjusted body fat percentage at 12 weeks (FATP)*, *circulating glucose at 19*  
904 *weeks (GLU)*, *circulating triglycerides at 19 weeks (TRGL)*, *circulating insulin at 8 weeks*  
905 *(INSUL)* and *urine creatinine at 20 weeks (UCRT)*.

906

907 **Figure 4.** Distribution of prediction accuracies (from 20 replicates) for scenarios including  
908 progressive distance between reference and validation sets using GBLUP, BayesB, elastic  
909 net (ENET) and gradient boosting machine (GBM) models. *Traits: Bone mineral density at*  
910 *12 weeks (BMD)*, *Body weight at 10, 15 and 20 weeks (BW10, BW15 and BW20)*; *circulating*  
911 *cholesterol at 19 weeks (CHOL)*, *adjusted body fat percentage at 12 weeks (FATP)*,  
912 *circulating glucose at 19 weeks (GLUC)*, *circulating triglycerides at 19 weeks (TRGL)*,  
913 *circulating insulin at 8 weeks (INSUL)* and *urine creatinine at 20 weeks (UCRT)*

914

915 **Figure 5.** (A and B) Venn diagrams showing the unique animals among the top 20 (above)  
916 predicted values (10% of the validation subset) between models and (C and D) the number  
917 of SNP markers in common or in high LD ( $r^2 > 0.90$ ) among the top 1,000 SNP from GBLUP,  
918 BayesB (BB), elastic net (ENET) and gradient boosting machine (GBM) for BW10 (A and C)  
919 and GLUC (B and D). In C and D, values represent the overlap of SNP when Model\_1 (y-  
920 axis) is considered as reference. *Traits: Body weight at 10, weeks (BW10)*; *circulating*  
921 *glucose at 19 weeks (GLUC)*.

922

923

924

925

926



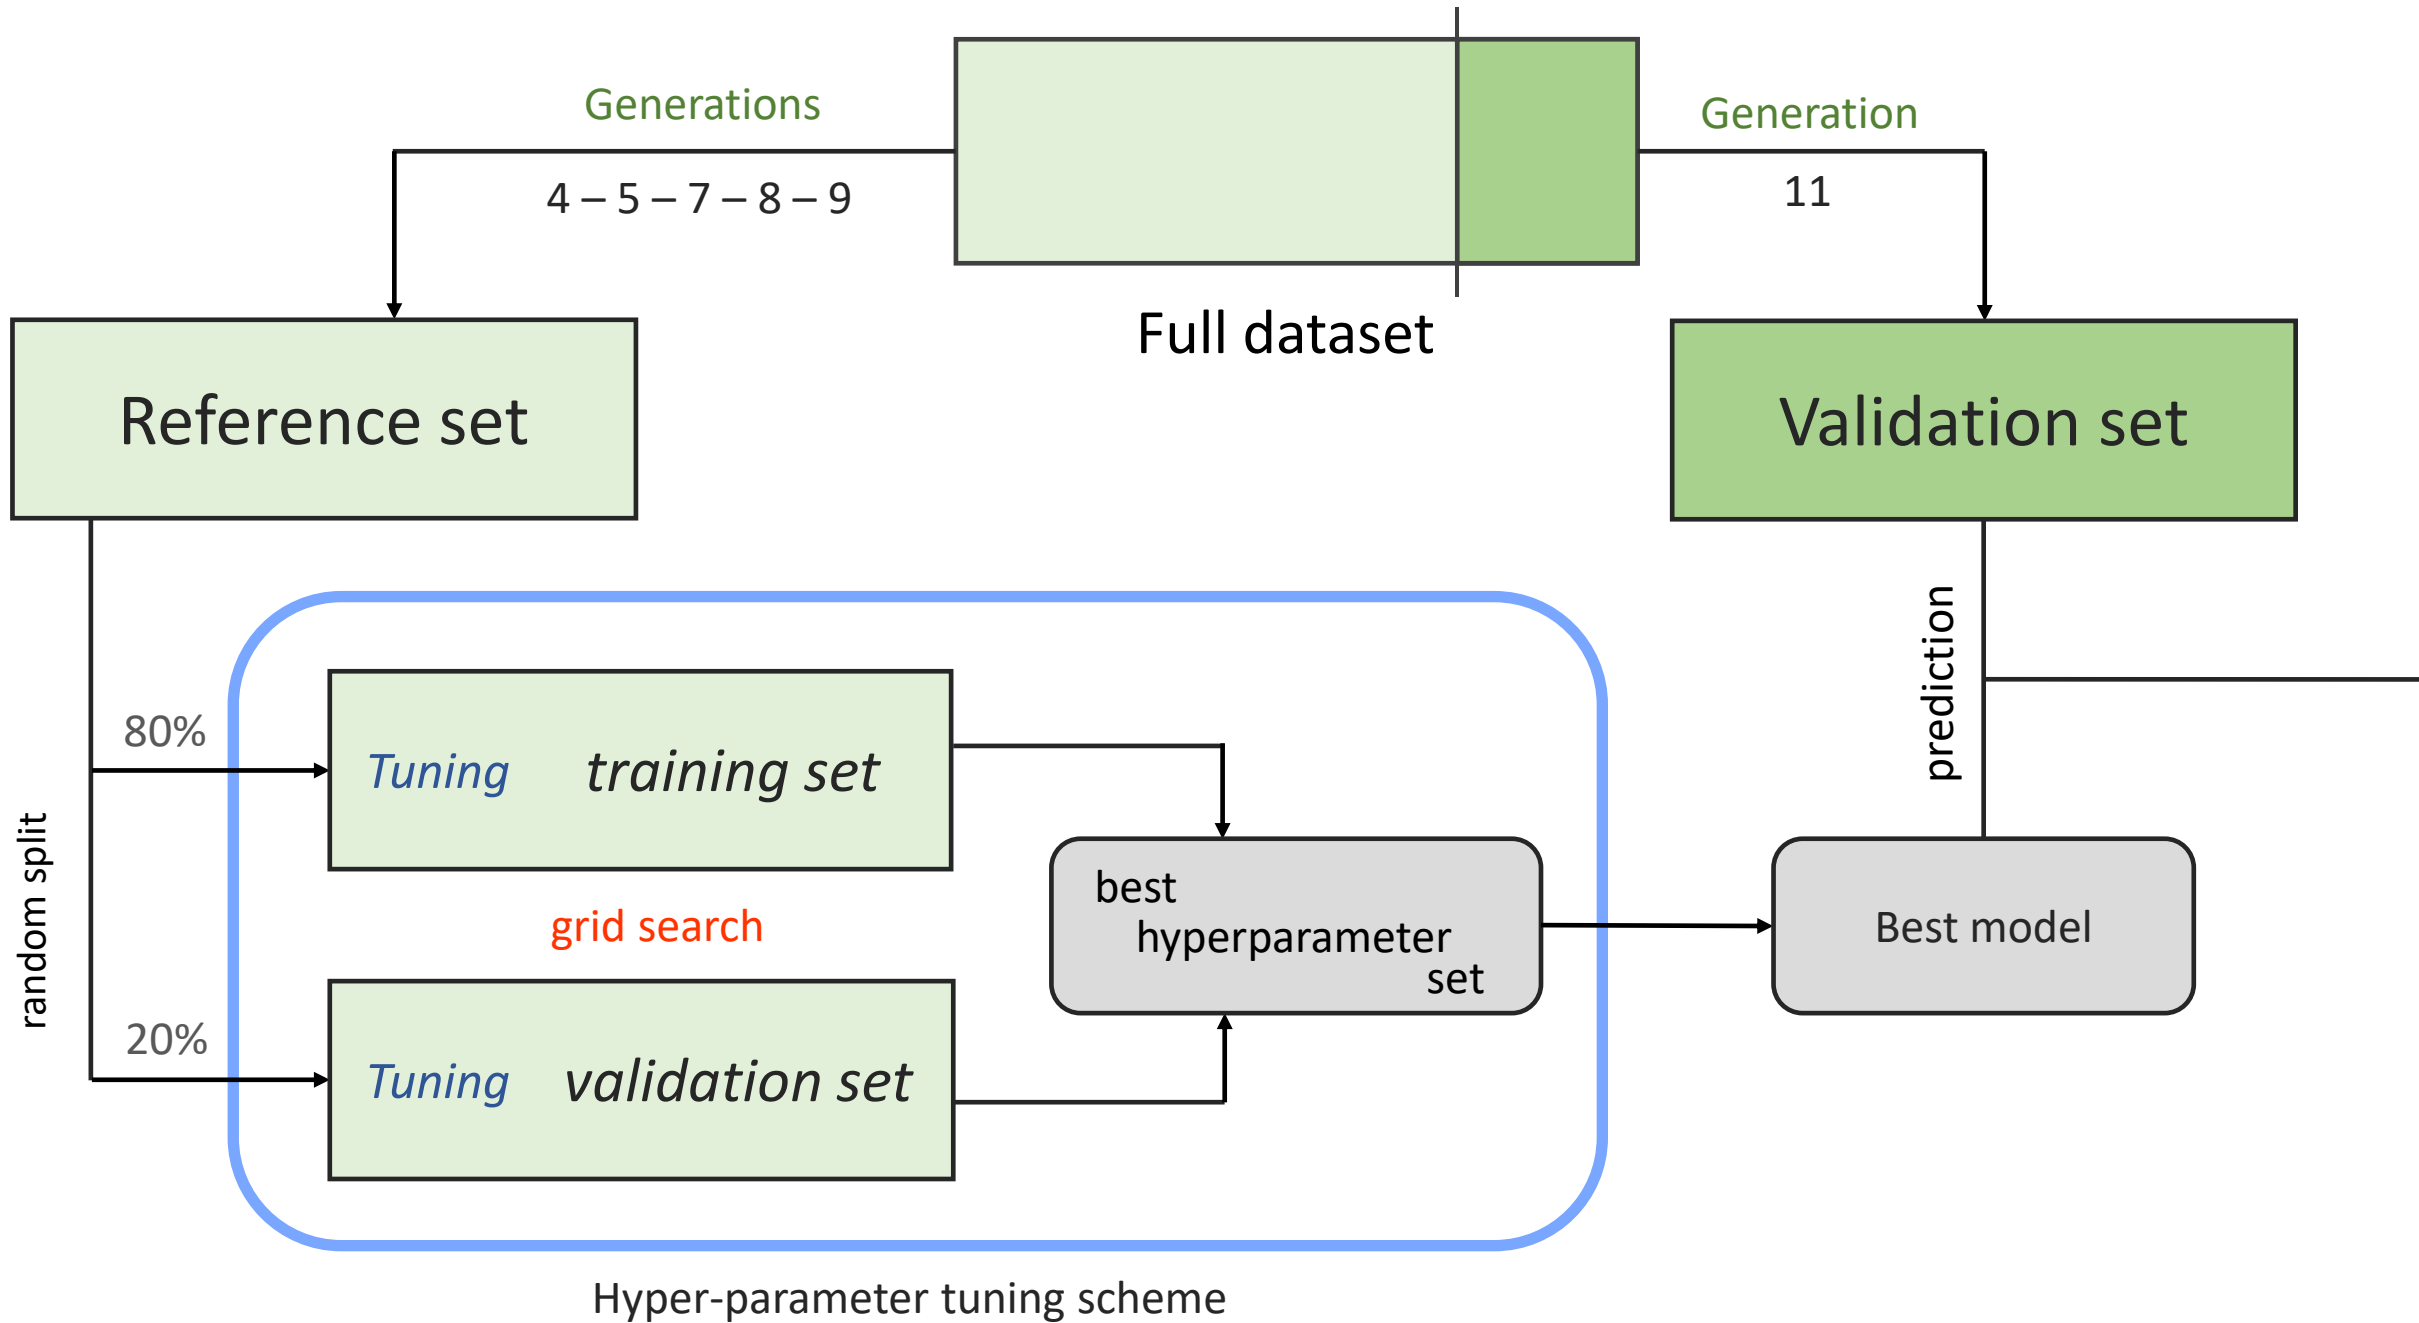

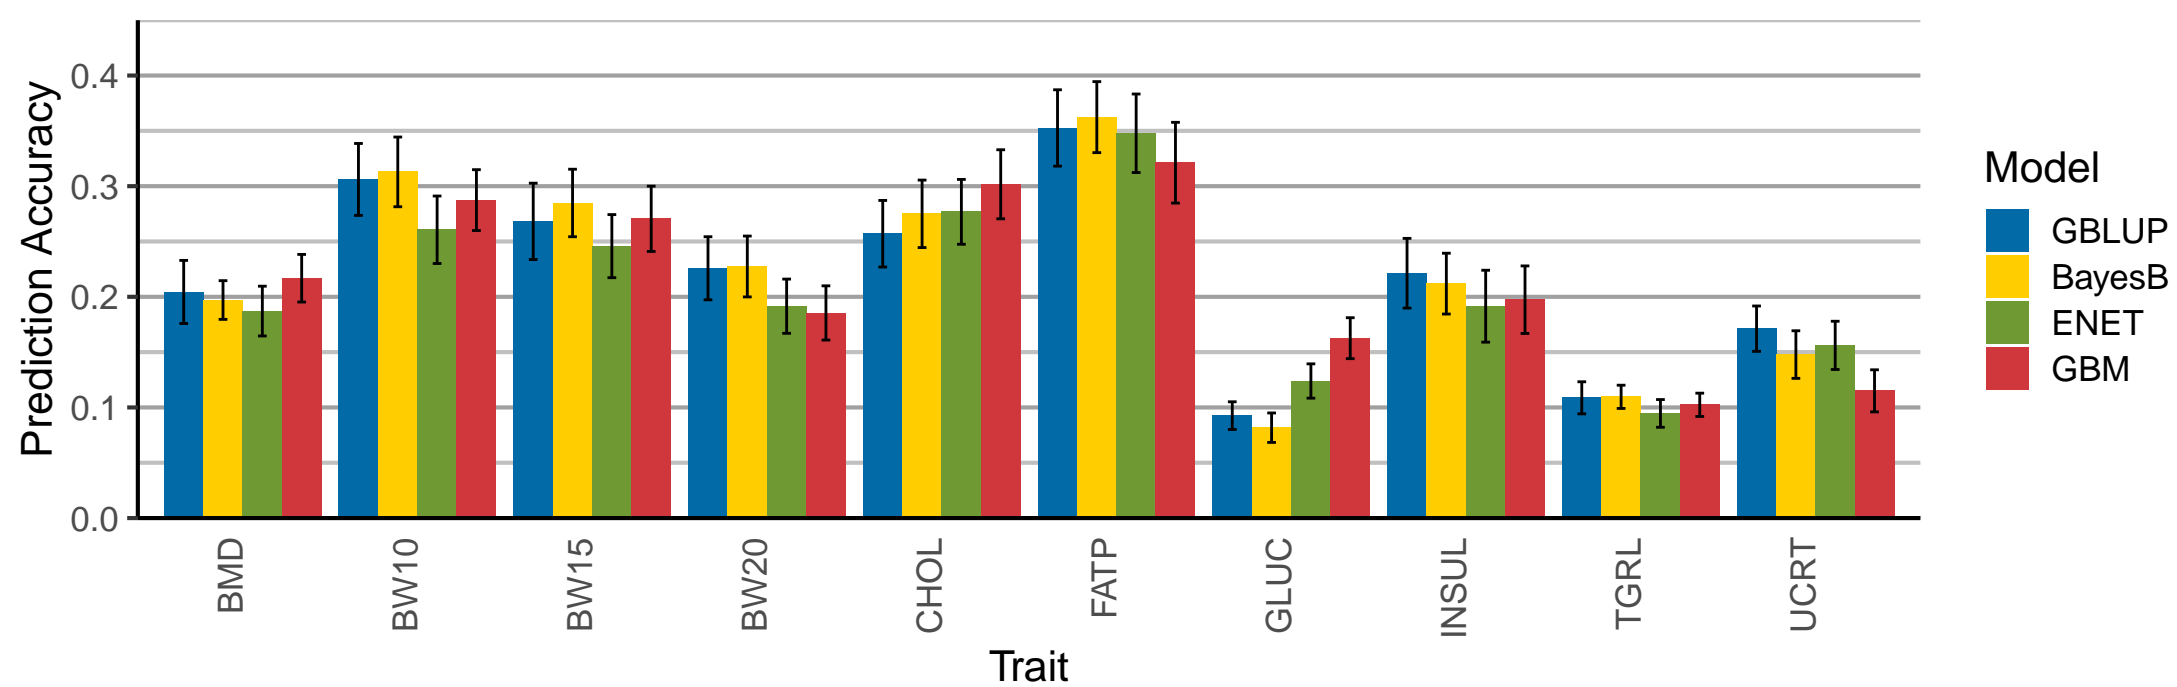

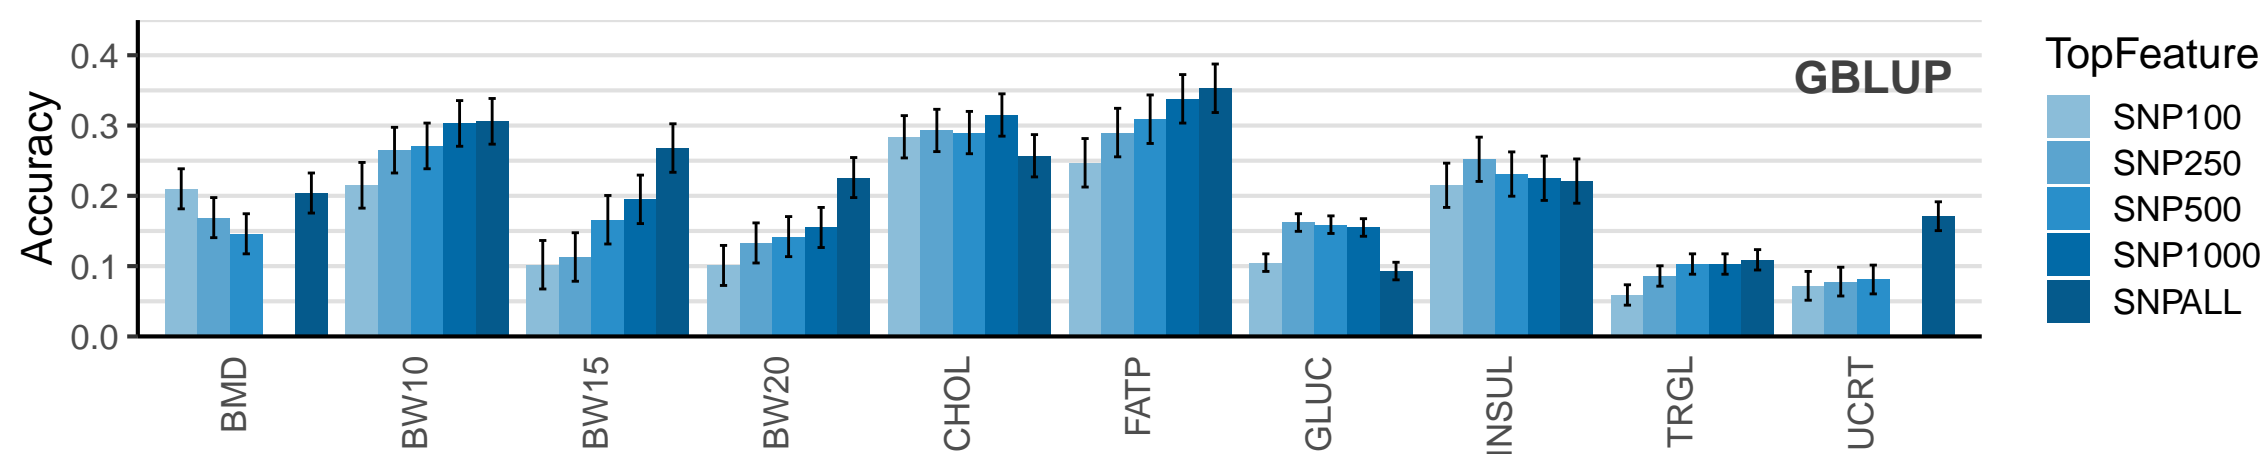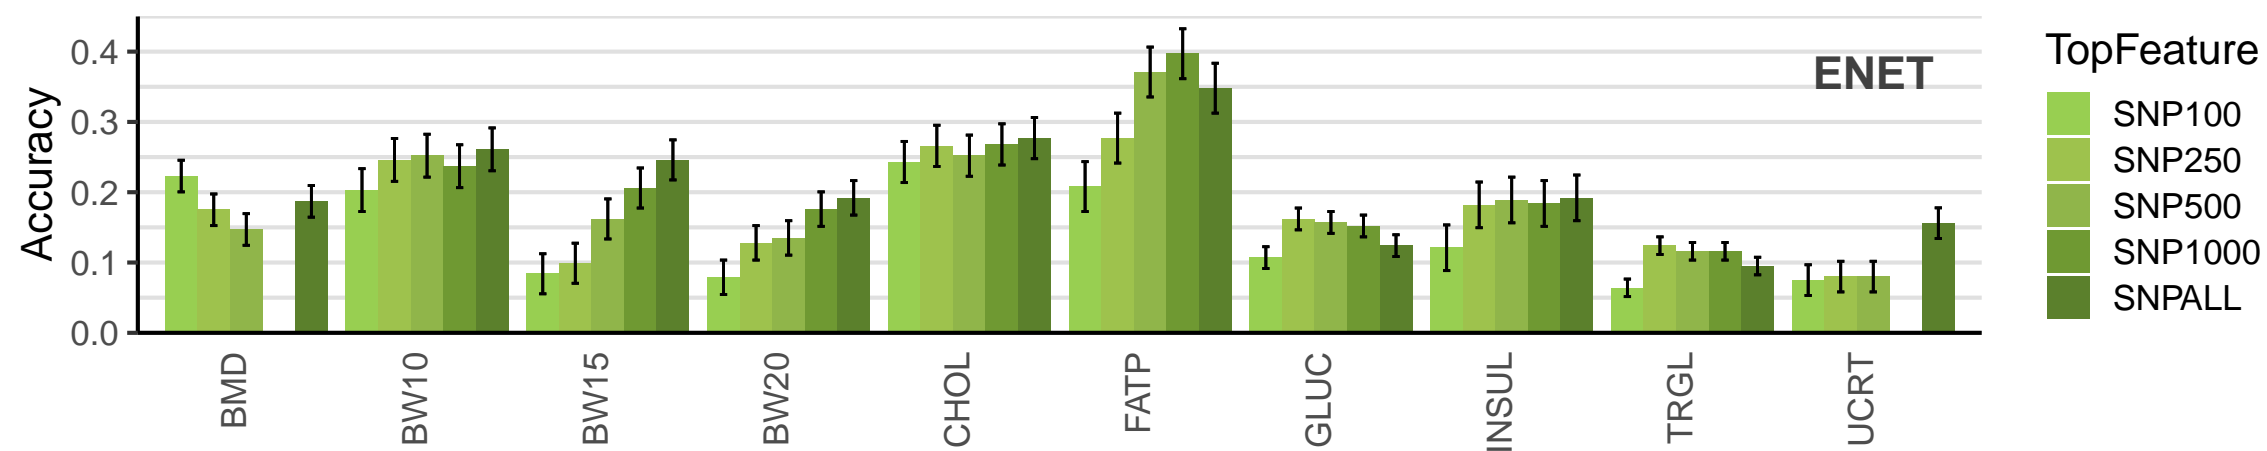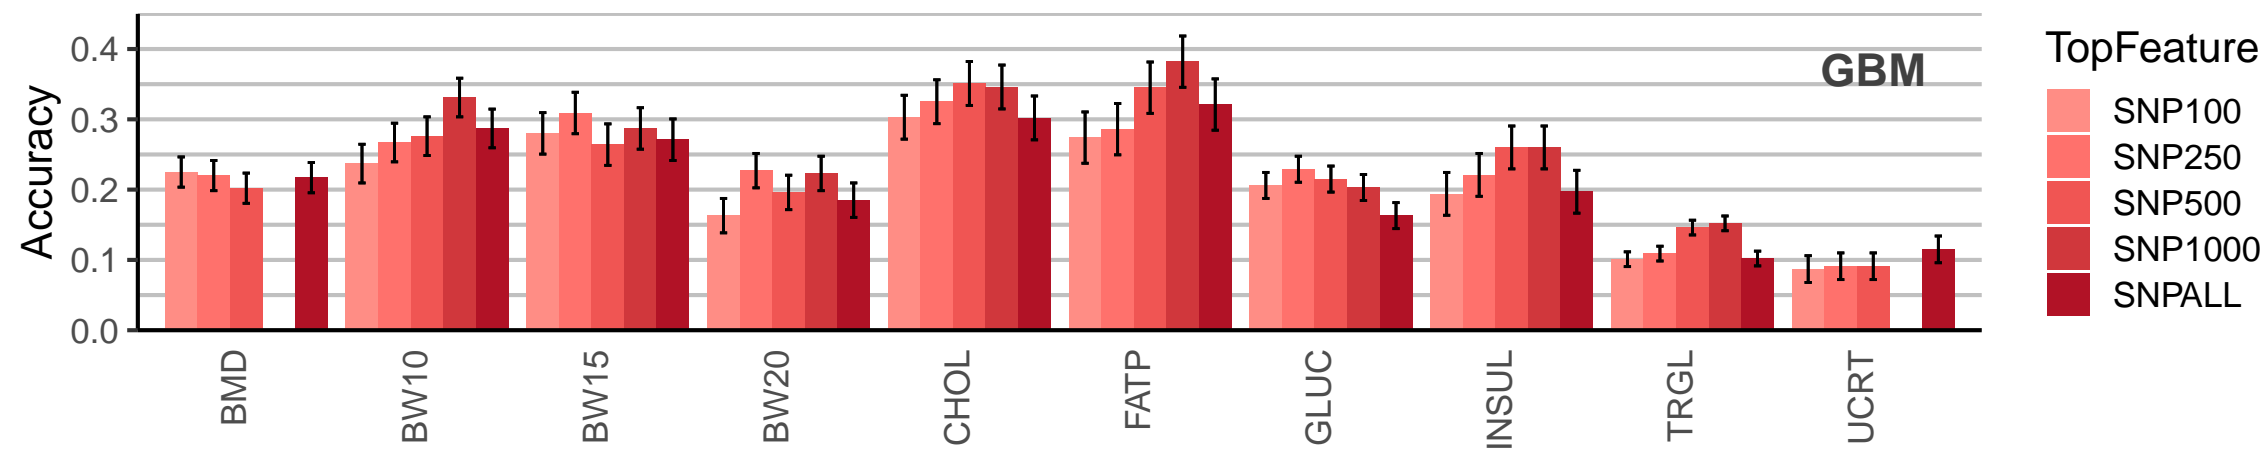

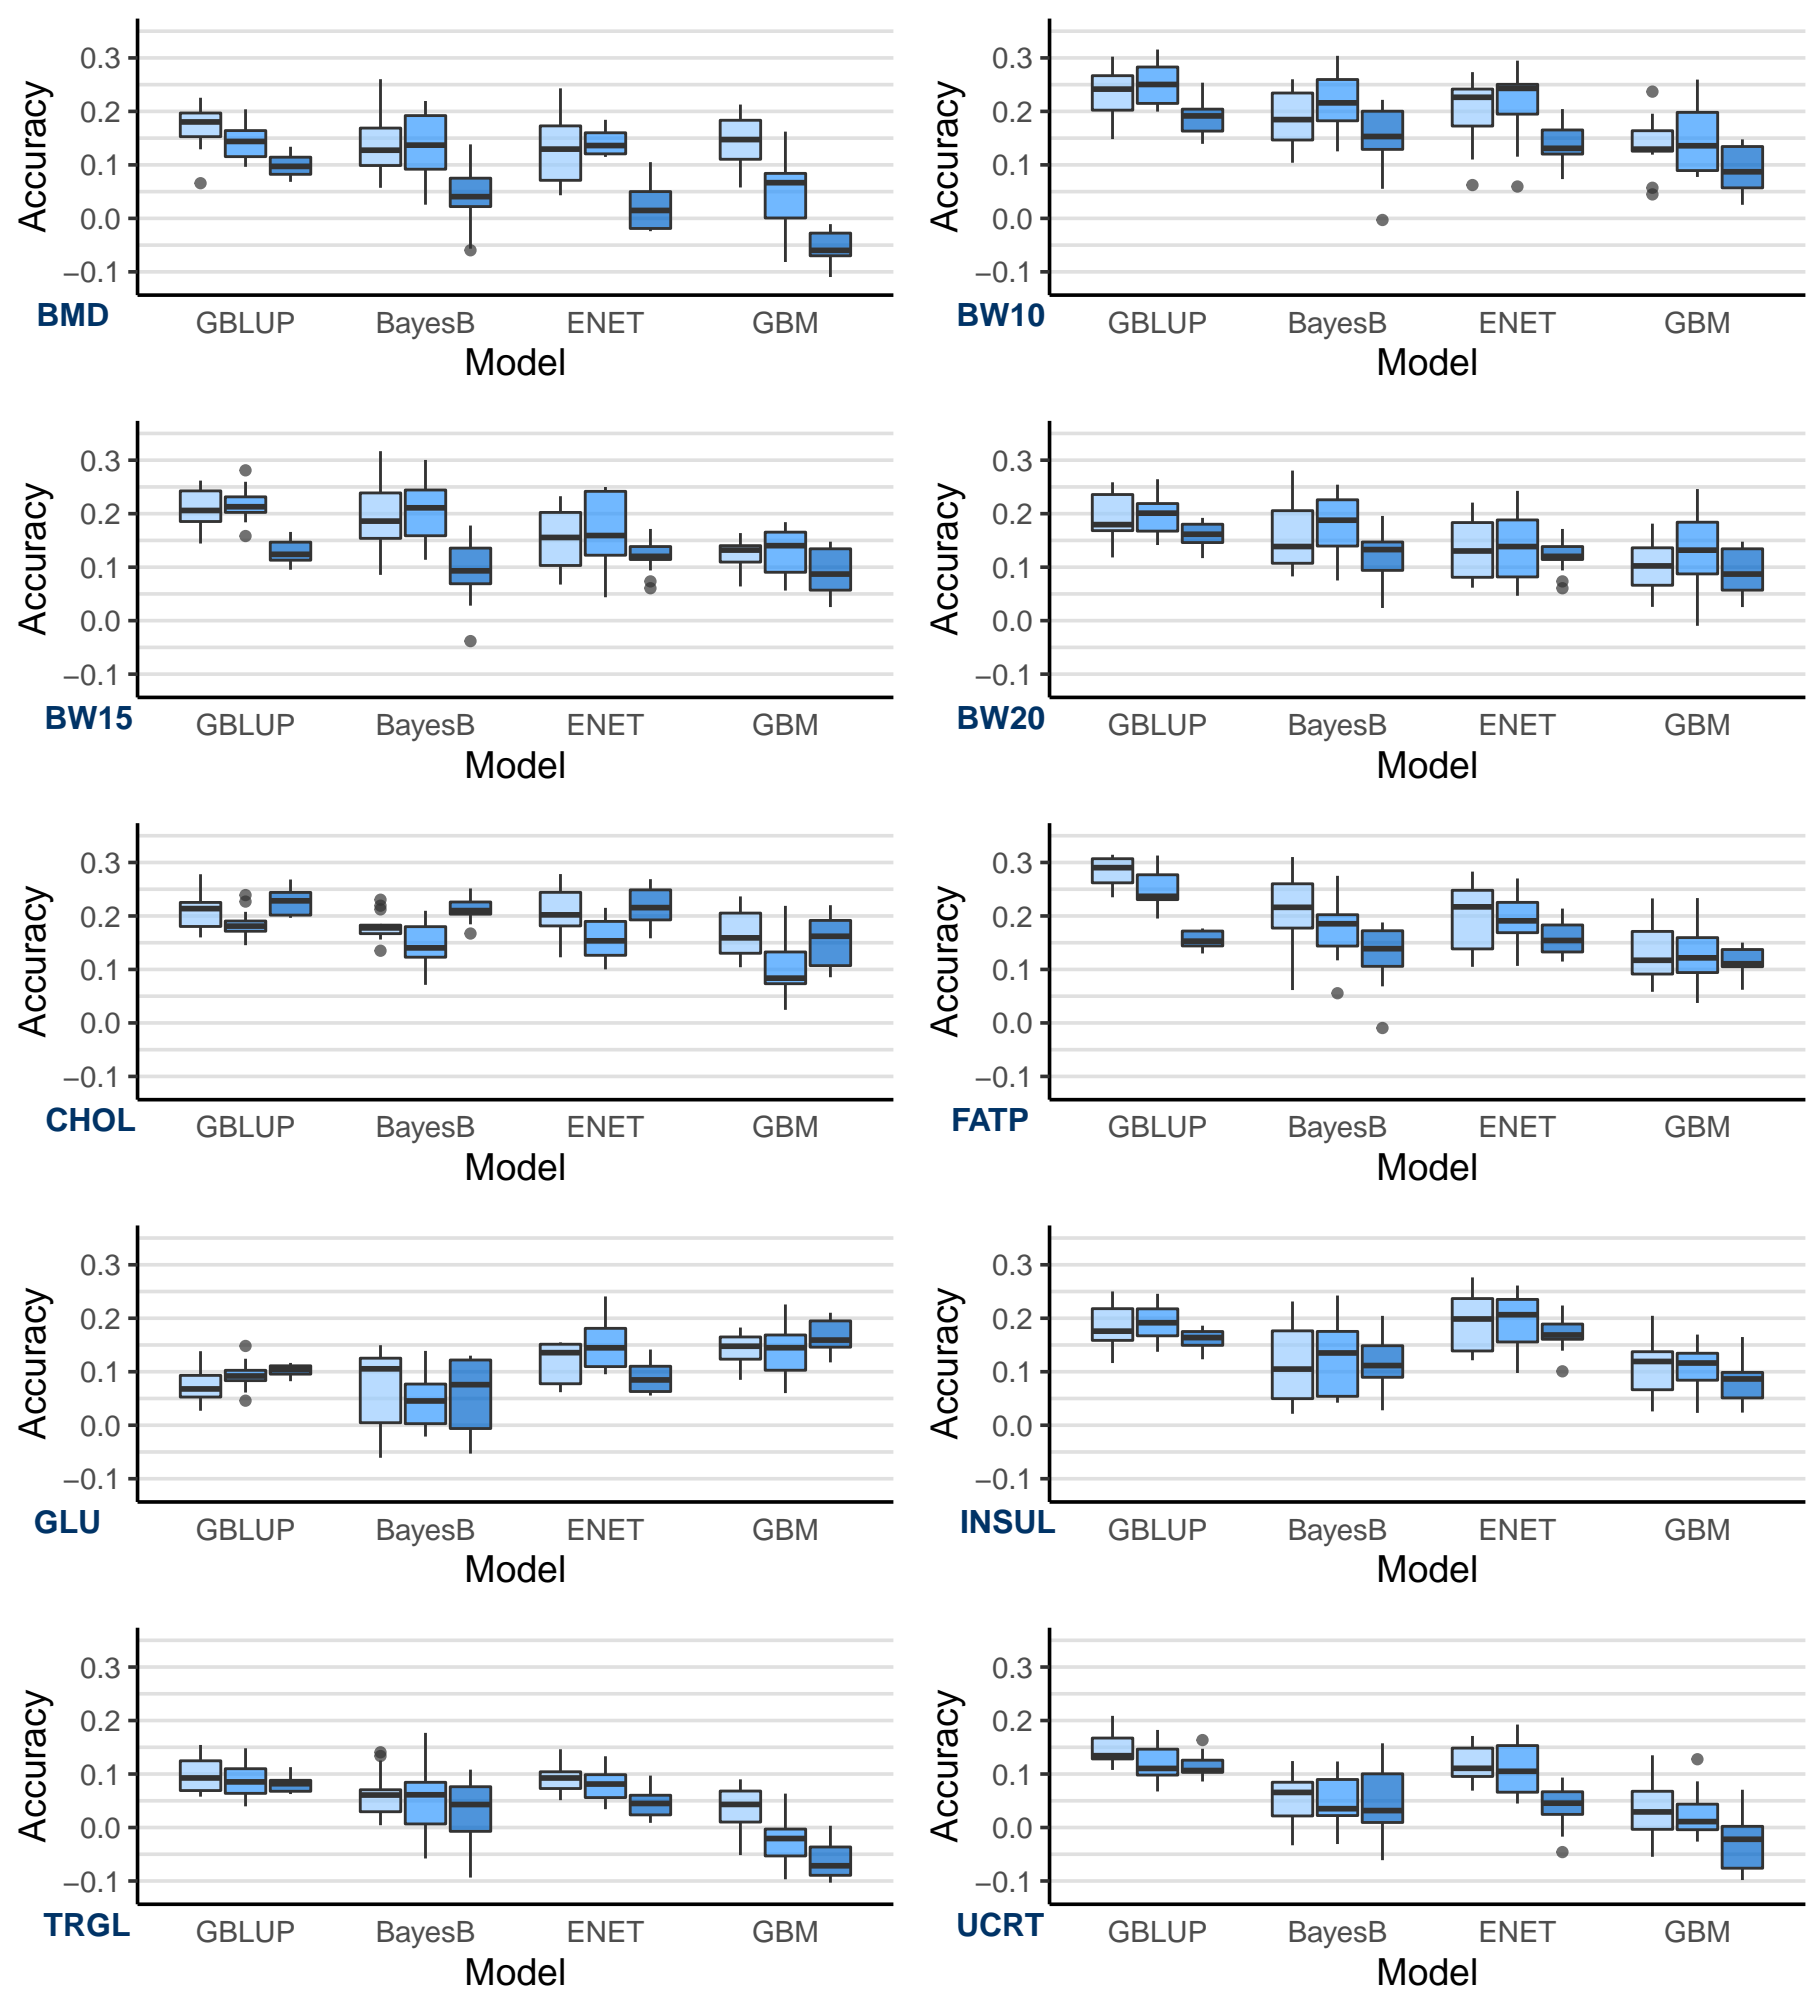

Scenario  NoGAP  GAP9  GAP89

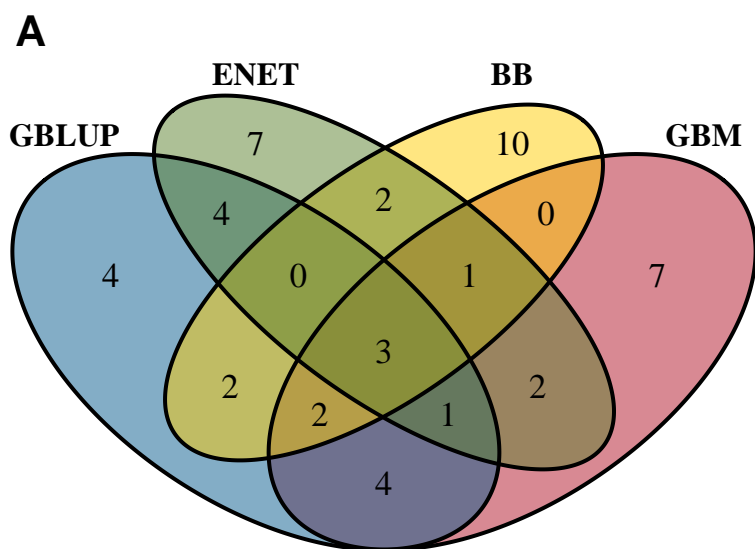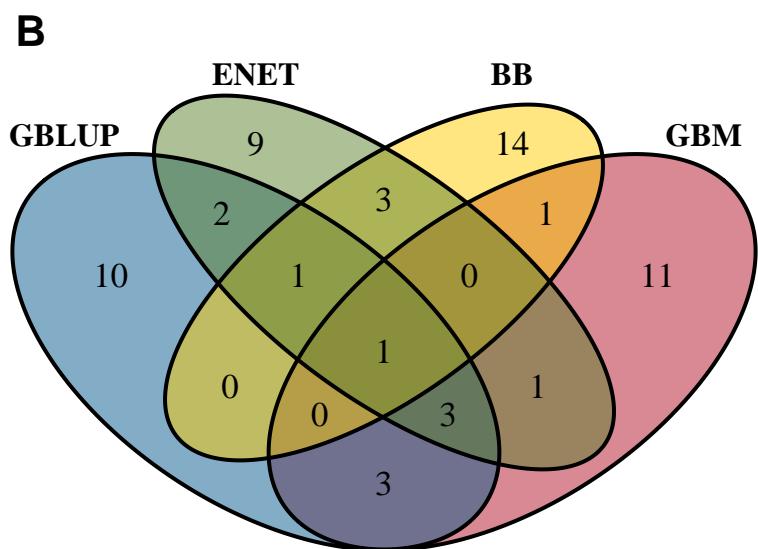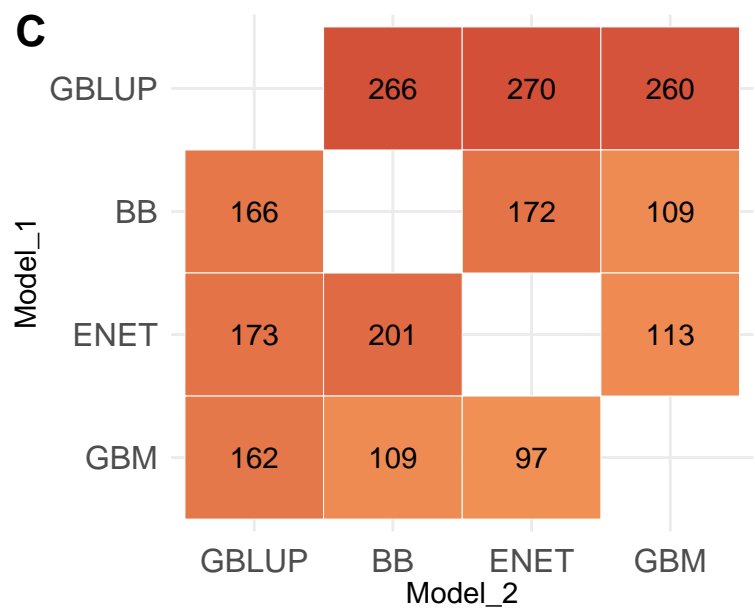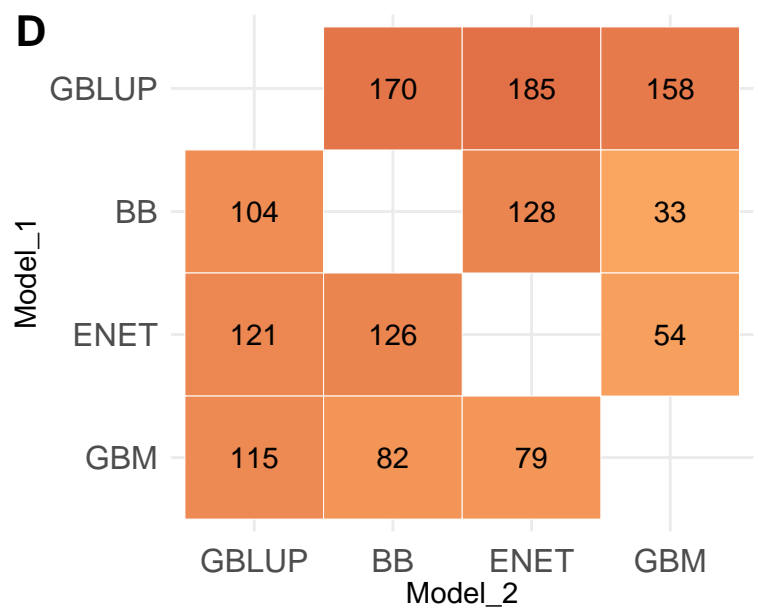

Source: http://biorxiv.org/content/10.1101/2021.08.02.454826v1.full.pdf
